# Supplementary material
Source: PubMed Central journal article supplement (PMC2929276)
Supplement: NIHMS206172-supplement-01.pdf [file NIHMS206172-supplement-01.pdf]

## Supplement 1

### **Supplemental Methods and Materials**

#### **Construction of the *Clock* shRNA and AAV Purification**

A small hairpin RNA (shRNA) against *Clock mRNA* was constructed by selecting a unique 24 base sequence (5'-GAACATCAGGCTATGATTACTATC-3') in the coding region of *Clock mRNA*. For the scrambled shRNA, a random sequence of 24 bases (5'-CGGAATTTAGTTACGGGGATCCAC-3') that had no sequence similarities with any known genes/mRNA was used. An antisense sequence of the selected mRNA region followed by a miR23 loop of 10 nucleotide (CTTCCTGTCA) was added at the 5' end of the above sequences. These shRNAs were designed as synthetic duplexes with overhang ends identical to those created by Sap I and Xba I restriction enzyme digestion. The annealed oligonucleotides were cloned into the adeno-associated virus (AAV) plasmid expressing enhanced green fluorescent protein (Stratagene, La Jolla, CA). Viral production was carried out using a helper-free triple transfection method in HEK 293 cells (ATCC) as described in Hommel *et al.* (1) and was purified according to Zolotukhin *et al.* (2).

#### **Stereotaxic Surgery**

Mice were anesthetized with a mixture of ketamine (50 mg/kg body weight) and xylazine (10 mg/kg body weight) in saline (0.9% NaCl). Bilateral stereotaxic injections of 1 µl of purified high titer AAV encoding scrambled or *Clock* shRNA was injected into the VTA (from bregma: angle 7<sup>0</sup>, AP-3.2 mm, Lat +1.0, DV -4.6) using a 33 gauge hamilton syringe (Hamilton, Reno, NV). Injection speed was 0.1 µl/minute, and the needle was kept in place for an additional 5 minutes before it was slowly withdrawn. Mice recovered for two weeks in their home cage before testing.

## **Immunohistochemistry**

Mice were anesthetized with a mixture of Nembutal (50 mg/kg) in saline, and they were perfused transcardially with 4% paraformaldehyde in 1X PBS (1 mM KH<sub>2</sub>PO<sub>4</sub>, 10 M Na<sub>2</sub>HPO<sub>4</sub>, 137 mM NaCl, 2.7 mM KCl, pH 7.4) and placed in 1X PBS-30% glycerol. 30 µm brain sections were obtained with a microtome (Leica, Wetzlar, Germany) and immunohistochemical staining was carried out using standard procedures (3). The following antibodies were used: tyrosine hydroxylase mouse monoclonal antibody (Sigma, St. Louis, MO), and GFP rabbit polyclonal antibody (AbCam, Cambridge, MA). Secondary antibodies (anti-mouse or rabbit conjugated with Alexa 488/rhodamine) were purchased from Molecular Probes (Carlsbad, CA). Brain sections were mounted using Vectashield (Vector Labs, Burlingame, CA) and observed with an epifluorescence microscope.

## **Validation of Injections and Infections**

To identify the location of viral injection and/or EGFP expression, mice were killed after the completion of behavioral tests and the brain sections were immunostained with TH antibody and GFP. Subsequently, individual brain sections were visualized using a fluorescence microscope with 4 and 20X objectives. VTA cells showing more than 30% of EGFP co-localization with TH antibody staining were included for the analyses of different behavioral pattern. Mice (~2-3%) with injections that were visibly outside of the VTA were excluded from the study. As reported previously (4), the AAV infected only neurons and did not cause detectable toxicity.

## **Behavioral Measures**

Locomotor Response to Novelty: Mice were individually placed in automated locomotor activity chambers equipped with infrared photobeams (San Diego Instruments, San Diego, CA) and measurements began immediately. Activity of the animal was continuously measured and the data was collected in 5-min blocks over a period of 2 hours.

Circadian Rhythms: To record the rhythm of locomotor activity, mice were individually housed in cages equipped with 12.5-cm diameter stainless steel running wheels. Wheel revolutions were registered by a microswitch mounted on the outside of the cage. Above cages were placed inside a ventilated and timer controlled lighting chambers (interior dimensions: 56 × 44 × 180 cm). Lighting within the chamber was provided by a 40 W "cool white" fluorescent light, with intensity measured at 300 to 600 lux inside the cages. Mice were maintained under a 12:12 light/dark (L/D) cycle. After collecting running wheel activity data for one week, the mice were released into constant darkness (D/D) and activity data were collected for an additional 15 days. Period and amplitude are obtained and analyzed from the activity records (actograms) using ClockLab software (Actimetrics, Wilmette, IL) (5). Recordings from individual animals during L/D and D/D portions of the experiment were analyzed separately.

Elevated Plus Maze: Mice were placed in the center of an elevated plus maze (arms are 30 × 5 cm, with 25 cm tall walls on the closed arms) under low light levels and their behavior was monitored for 5 min. The time spent on the closed and open arms, as well as the number of explorations of open and closed arms were determined by video tracking software, Ethovision 3.0 (Noldus, Leesburg, VA). Time spent on the open arm and percent of entries into the open arm are both negatively correlated with anxiety-like behavior. The apparatus was cleaned and allowed to dry between every mouse.

Dark/Light Test: The dark/light apparatus consisted of 2-chambered boxes (25 cm x 26 cm for each side, Med Associates, St. Albans, VT). One side was kept dark (room light entry limited) and the other side was brightly lit by a fluorescent bulb across the top. Mice were first placed in dark side for 2 min, then the automatic door between the compartments was opened and they were allowed to freely explore either the light or dark side for 10 min. Anxiety-like behavior was measured as the time spent in the lit side during the final 10 min.

Open Field: Mice were placed in at the periphery of an open field (44 x 44 cm, with 30 cm high wall on the periphery of the field) and allowed to explore for 5 min. Mice were tracked by video camera and time spent at the periphery (5 cm from the wall) and the center (14 x 14 cm) was calculated by video tracking software, Ethovision 3.0 (Noldus).

Forced Swim Test: The forced swim test was performed according to Krishnan *et al.*, 2007 (6). Mice were videotaped while they were in a 4 liter Pyrex glass beaker containing 3 liters of water at  $24 \pm 1^\circ\text{C}$  for 6 min. After a 2 min lead time, latency to immobility (latency) was determined as the first cessation of all movement. The videotape was scored manually by a trained and blinded observer. Total immobility was measured as the time spent without any motion except for single limb paddling to maintain flotation.

Learned Helplessness: Mice were placed in a chamber (Med Associates) where they received 2 foot shocks (5 sec duration, 0.35 mA) per min for one hour and the door of the chamber was closed so that they could not escape. After one hour they were returned to their home cage. This was repeated for 2 days. On the 3<sup>rd</sup> day the automatic door was opened simultaneously with the delivery of each foot shock (0.35 mA, 25 sec) letting the mice escape. The mice received 15 trials on the test day. The latency to escape and the number of failures was measured.

### **Microarray Analysis**

RNA from VTA punches was isolated from 3 animals/group (*Clock* shRNA or scr shRNA). The RNA was amplified and labeled according to the manufacturer's instructions (Affymetrix, Santa Clara, CA). Affymetrix mouse genome 430A 2.0 arrays were hybridized with RNA from individual animals, washed, and scanned in our microarray facility at UT Southwestern according to the manufacturer's instructions. All arrays were normalized using the probe logarithmic intensity error estimation (PLIER) algorithm in the Genespring program. Details on

quality control measures can be found in the MIAME report, below. Comparative analysis was performed in Genespring using the Mann Whitney statistical test followed by t-tests to determine statistical significance. Genes were considered to be regulated if there was a greater than 1.36 fold change and  $p$  value less than 0.05 following both tests. Analysis is similar to that published in Wallace *et al.*, 2009 (7). Benjamini Hochberg analysis for these arrays indicates a false discovery rate of ~0.2 and in our post hoc analysis by qPCR we found that ~90% of changes were similarly replicated.

### **Real Time PCR**

cDNA was mixed with buffer, primers, SYBR green, and hot start Taq polymerase in a prepared master mix (Applied Biosystems, Foster City, CA). PCR reactions followed by a dissociation reaction to determine specificity of the amplified product were run on a Real-Time PCR machine (7300 Real Time PCR machine, Applied Biosystems). The amount of gene expression was quantified using the  $\Delta\Delta C_t$  method as previously described (8). A list of primers used in this study are given in Table S3.

### **Electrophysiology**

Horizontal sections of the VTA (250  $\mu\text{m}$ ) were prepared with a vibratome (DTK-1000, Japan) in sucrose–artificial cerebrospinal fluid (aCSF). Slices were placed in a holding chamber and allowed to recover for at least 1 hr before being placed in the recording chamber at 32–34°C containing aCSF composed of (in mM): (128 NaCl, 3 KCl, 1.25  $\text{NaH}_2\text{PO}_4$ , 10 D-glucose, 24  $\text{NaHCO}_3$ , 2  $\text{CaCl}_2$ , and 2  $\text{MgSO}_4$ ), (pH 7.35, 295–305 mOsm) and saturated with 95%  $\text{O}_2$ -5%  $\text{CO}_2$ . Cells were visualized using infrared differential interference contrast video microscopy. The partial access recording mode was used to measure the firing rate of VTA neurons. This recording mode was similar to one described by Han *et al.* (9). Patch pipettes (3–5 M $\Omega$ ) for partial access recording were filled with an internal solution (115 mM potassium gluconate, 20

mM KCl, 10 mM HEPES, 1.0 mM EGTA, 4 mM ATP-Mg, and 0.3 mM GTP (pH 7.2, 280–290 mOsm)). After making a giga seal, the partial access recording mode was established by maintaining the giga seal and regular spontaneous spikes of VTA neurons could be seen clearly after the mode establishment. The average firing rate for each cell was recorded at 3 min after obtaining a stable baseline firing. The whole cell current-clamp recordings were performed to measure I<sub>h</sub> current after finishing the firing rate recording. Dopamine neurons were identified electrophysiologically by the presence of an I<sub>h</sub> current, using an 800 ms and 300 pA hyperpolarizing step from a holding potential of –70 mV. Although I<sub>h</sub> is present in both dopamine and non-dopamine VTA neurons, previous works have suggested a high correlation between the presence of I<sub>h</sub> and tyrosine hydroxylase, indicative of dopamine neurons (10,11)

**Supplemental Results****Table S1.** Genes that are significantly regulated following *Clock* knock-down in the VTA

| <b>Affy ID</b> | <b>Fold</b> | <b>Change</b> | <b>Symbol</b>          | <b>Gene</b>                                                       |
|----------------|-------------|---------------|------------------------|-------------------------------------------------------------------|
| 1450468_at     | 8.502007    | Up            | Myoc                   | myocilin                                                          |
| 1416236_a_at   | 6.627885    | Up            | Mpzl2                  | myelin protein zero-like 2                                        |
| 1416325_at     | 4.9057035   | Up            | Crisp1                 | cysteine-rich secretory protein 1                                 |
| 1422324_a_at   | 4.164185    | Up            | Pthlh                  | parathyroid hormone-like peptide                                  |
| 1424525_at     | 3.8077345   | Up            | Grp                    | gastrin releasing peptide                                         |
| 1451297_at     | 2.9860055   | Up            | Gulo                   | gulonolactone (L-) oxidase                                        |
| 1419533_at     | 2.8283818   | Up            | Nhlh1                  | nescient helix loop helix 1                                       |
| 1423171_at     | 2.8068814   | Up            | Gpr88                  | G-protein coupled receptor 88                                     |
| 1449838_at     | 2.7924569   | Up            | Crisp3                 | cysteine-rich secretory protein 3                                 |
| 1456934_at     | 2.7801776   | Up            | Calb1                  | calbindin 1                                                       |
| 1437588_at     | 2.7762008   | Up            | Pou4f2                 | POU domain, class 4, transcription factor 2                       |
| 1448738_at     | 2.7489667   | Up            | Calb1                  | calbindin 1                                                       |
| 1459916_at     | 2.705844    | Up            |                        |                                                                   |
| 1440534_at     | 2.7044392   | Up            | ENSMUSG00000056615     | predicted gene, ENSMUSG00000056615                                |
| 1422318_at     | 2.6855168   | Up            | Foxd4                  | forkhead box D4                                                   |
| 1417262_at     | 2.6400938   | Up            | Ptgs2                  | prostaglandin-endoperoxide synthase 2                             |
| 1418047_at     | 2.6122668   | Up            | Neurod6                | neurogenic differentiation 6                                      |
| 1418601_at     | 2.5793004   | Up            | Aldh1a7                | aldehyde dehydrogenase family 1, subfamily A7                     |
| 1421855_at     | 2.5686846   | Up            | Fgl2                   | fibrinogen-like protein 2                                         |
| 1455931_at     | 2.567009    | Up            | Chrna3                 | cholinergic receptor, nicotinic, alpha polypeptide 3              |
| 1420799_at     | 2.561983    | Up            | LOC100047803 /// Ntsr1 | similar to neurotensin receptor type 1 /// neurotensin receptor 1 |
| 1421811_at     | 2.5502687   | Up            | LOC640441 /// Thbs1    | similar to thrombospondin 1 /// thrombospondin 1                  |
| 1419569_a_at   | 2.453646    | Up            | Isg20                  | interferon-stimulated protein                                     |
| 1452010_at     | 2.450356    | Up            | Chrna3                 | cholinergic receptor, nicotinic, alpha polypeptide 3              |
| 1438483_at     | 2.4389315   | Up            | Nos1                   | nitric oxide synthase 1, neuronal                                 |
| 1442035_at     | 2.419081    | Up            | Chrna5                 | cholinergic receptor, nicotinic, alpha polypeptide 5              |
| 1460482_at     | 2.397706    | Up            | 3110047P20Rik          | RIKEN cDNA 3110047P20 gene                                        |
| 1443990_at     | 2.3600848   | Up            | Ntrk1                  | neurotrophic tyrosine kinase, receptor, type 1                    |
| 1452514_a_at   | 2.3454661   | Up            | Kit                    | kit oncogene                                                      |
| 1429330_at     | 2.3322966   | Up            | Gabra4                 | gamma-aminobutyric acid (GABA-A) receptor, subunit alpha 4        |
| 1437502_x_at   | 2.3252919   | Up            | Cd24a /// EG621324     | CD24a antigen /// predicted gene, EG621324                        |
| 1418734_at     | 2.3143573   | Up            | BE136769               | expressed sequence BE136769                                       |

|              |           |    |                    |                                                                    |
|--------------|-----------|----|--------------------|--------------------------------------------------------------------|
| 1423754_at   | 2.3140225 | Up | Ifitm3             | interferon induced transmembrane protein 3                         |
| 1417504_at   | 2.3058531 | Up | Calb1              | calbindin 1                                                        |
| 1449431_at   | 2.3052564 | Up | Trpc6              | transient receptor potential cation channel, subfamily C, member 6 |
| 1436370_at   | 2.2696326 | Up | Gucy2c             | guanylate cyclase 2c                                               |
| 1437932_a_at | 2.2634416 | Up | Cldn1              | claudin 1                                                          |
| 1423505_at   | 2.2450657 | Up | Tagln              | transgelin                                                         |
| 1448213_at   | 2.2360156 | Up | Anxa1              | annexin A1                                                         |
| 1433715_at   | 2.2167685 | Up | Cpne7              | copine VII                                                         |
| 1440148_at   | 2.2105973 | Up | Gpr6               | G protein-coupled receptor 6                                       |
| 1449917_at   | 2.203227  | Up | Pitx3              | paired-like homeodomain transcription factor 3                     |
| 1439575_at   | 2.197783  | Up | E130009J12Rik      | RIKEN cDNA E130009J12 gene                                         |
| 1437340_x_at | 2.1867504 | Up | Gkn1               | gastrokine 1                                                       |
| 1430130_at   | 2.168724  | Up | Vwce               | von Willebrand factor C and EGF domains                            |
| 1423213_at   | 2.1667786 | Up | Plxnc1             | plexin C1                                                          |
| 1448182_a_at | 2.1466467 | Up | Cd24a /// EG621324 | CD24a antigen /// predicted gene, EG621324                         |
| 1416454_s_at | 2.131175  | Up | Acta2              | actin, alpha 2, smooth muscle, aorta                               |
| 1428657_at   | 2.130883  | Up | Rreb1              | ras responsive element binding protein 1                           |
| 1437029_at   | 2.1299975 | Up | Tacr3              | tachykinin receptor 3                                              |
| 1424113_at   | 2.128647  | Up | Lamb1-1            | laminin B1 subunit 1                                               |
| 1417917_at   | 2.1226532 | Up | Cnn1               | calponin 1                                                         |
| 1437079_at   | 2.1214695 | Up | Slc18a2            | solute carrier family 18 (vesicular monoamine), member 2           |
| 1433707_at   | 2.1211236 | Up | Gabra4             | gamma-aminobutyric acid (GABA-A) receptor, subunit alpha 4         |
| 1441926_x_at | 2.1167936 | Up | Tmie               | transmembrane inner ear                                            |
| 1460528_at   | 2.1096199 | Up | 4930413G21Rik      | RIKEN cDNA 4930413G21 gene                                         |
| 1434442_at   | 2.1038942 | Up | Stbd1              | starch binding domain 1                                            |
| 1424114_s_at | 2.0818143 | Up | Lamb1-1            | laminin B1 subunit 1                                               |
| 1436013_at   | 2.077168  | Up | Gsg1l              | GSG1-like                                                          |
| 1430480_at   | 2.0743778 | Up | Nub1               | negative regulator of ubiquitin-like proteins 1                    |
| 1429210_at   | 2.0743515 | Up | Col23a1            | collagen, type XXIII, alpha 1                                      |
| 1442558_at   | 2.0733955 | Up | ENSMUSG00000072792 | predicted gene, ENSMUSG00000072792                                 |
| 1460332_at   | 2.072344  | Up | Pln                | phospholamban                                                      |
| 1451139_at   | 2.0679665 | Up | Slc39a4            | solute carrier family 39 (zinc transporter), member 4              |
| 1416953_at   | 2.057563  | Up | Ctgf               | connective tissue growth factor                                    |
| 1428812_at   | 2.0517435 | Up | 1700040L02Rik      | RIKEN cDNA 1700040L02 gene                                         |
| 1450427_at   | 2.0469482 | Up | Chrna6             | cholinergic receptor, nicotinic, alpha polypeptide 6               |
| 1418950_at   | 2.040756  | Up | Drd2               | dopamine receptor 2                                                |
| 1418440_at   | 2.0376909 | Up | Col8a1             | collagen, type VIII, alpha 1                                       |



|              |           |    |                                  |                                                                                                               |
|--------------|-----------|----|----------------------------------|---------------------------------------------------------------------------------------------------------------|
| 1455925_at   | 2.0366232 | Up | A73003517Rik ///<br>LOC100045224 | RIKEN cDNA A73003517 gene /// similar<br>to PR domain containing 8                                            |
| 1443964_at   | 2.0362587 | Up | Tmie                             | transmembrane inner ear                                                                                       |
| 1450803_at   | 2.0361693 | Up | Ntf3                             | neurotrophin 3                                                                                                |
| 1420546_at   | 2.0306873 | Up | Th                               | tyrosine hydroxylase                                                                                          |
| 1441223_at   | 2.0250852 | Up | 4-Mar                            | membrane-associated ring finger (C3HC4)<br>4                                                                  |
| 1437339_s_at | 2.011117  | Up | Pcsk5                            | proprotein convertase subtilisin/kexin type<br>5                                                              |
| 1438851_x_at | 2.0087943 | Up | Cldn1                            | claudin 1                                                                                                     |
| 1424409_at   | 2.0052593 | Up | Cldn23                           | claudin 23                                                                                                    |
| 1421854_at   | 1.9955586 | Up | Fgl2                             | fibrinogen-like protein 2                                                                                     |
| 1446877_at   | 1.991153  | Up |                                  |                                                                                                               |
| 1440803_x_at | 1.9636214 | Up | Tacr3                            | tachykinin receptor 3                                                                                         |
| 1427633_a_at | 1.9606423 | Up | Pappa                            | pregnancy-associated plasma protein A                                                                         |
| 1443139_at   | 1.9556761 | Up |                                  |                                                                                                               |
| 1418697_at   | 1.9500623 | Up | Inmt                             | indolethylamine N-methyltransferase                                                                           |
| 1417429_at   | 1.9476374 | Up | Fmo1                             | flavin containing monooxygenase 1                                                                             |
| 1448669_at   | 1.937879  | Up | Dkk3                             | dickkopf homolog 3 ( <i>Xenopus laevis</i> )                                                                  |
| 1429887_at   | 1.9353999 | Up | Nos1                             | nitric oxide synthase 1, neuronal                                                                             |
| 1419738_a_at | 1.9284675 | Up | Tpm2                             | tropomyosin 2, beta                                                                                           |
| 1450750_a_at | 1.9268079 | Up | Nr4a2                            | nuclear receptor subfamily 4, group A,<br>member 2                                                            |
| 1429987_at   | 1.9204223 | Up | 9930013L23Rik                    | RIKEN cDNA 9930013L23 gene                                                                                    |
| 1437996_s_at | 1.9195483 | Up | Cnpy1                            | canopy 1 homolog (zebrafish)                                                                                  |
| 1435184_at   | 1.9132181 | Up | Npr3                             | natriuretic peptide receptor 3                                                                                |
| 1427201_at   | 1.9110541 | Up | Mustn1                           | musculoskeletal, embryonic nuclear<br>protein 1                                                               |
| 1416007_at   | 1.9035245 | Up | Satb1                            | special AT-rich sequence binding protein 1                                                                    |
| 1460011_at   | 1.9017785 | Up | Cyp26b1                          | cytochrome P450, family 26, subfamily b,<br>polypeptide 1                                                     |
| 1445642_at   | 1.9005165 | Up | Lemd1                            | LEM domain containing 1                                                                                       |
| 1445371_at   | 1.8934183 | Up | Tmem207                          | Transmembrane protein 207 (Tmem207),<br>mRNA                                                                  |
| 1433578_at   | 1.8898611 | Up | EG545758 /// Slc10a4             | predicted gene, EG545758 /// solute<br>carrier family 10 (sodium/bile acid<br>cotransporter family), member 4 |
| 1427401_at   | 1.8720524 | Up | Chrna5                           | cholinergic receptor, nicotinic, alpha<br>polypeptide 5                                                       |
| 1456632_at   | 1.8460486 | Up | Bcl11a                           | B-cell CLL/lymphoma 11A (zinc finger<br>protein)                                                              |
| 1454966_at   | 1.8420863 | Up | Itga8                            | integrin alpha 8                                                                                              |
| 1434025_at   | 1.8394747 | Up |                                  |                                                                                                               |
| 1432591_at   | 1.838851  | Up | Pappa                            | pregnancy-associated plasma protein A                                                                         |
| 1434785_at   | 1.8343841 | Up | Cacng5                           | calcium channel, voltage-dependent,<br>gamma subunit 5                                                        |
| 1454974_at   | 1.8332845 | Up | LOC672215 /// Ntn1               | similar to Netrin-1 precursor /// netrin 1                                                                    |
| 1441729_at   | 1.8293824 | Up |                                  |                                                                                                               |

|              |           |    |                             |                                                                                                     |
|--------------|-----------|----|-----------------------------|-----------------------------------------------------------------------------------------------------|
| 1420512_at   | 1.7983209 | Up | Dkk2                        | dickkopf homolog 2 ( <i>Xenopus laevis</i> )                                                        |
| 1433389_at   | 1.7838995 | Up | Cyp4f18 ///<br>LOC100044439 | cytochrome P450, family 4, subfamily f,<br>polypeptide 18 /// similar to cytochrome<br>P450 CYP4F18 |
| 1460043_at   | 1.7811419 | Up |                             |                                                                                                     |
| 1435553_at   | 1.778185  | Up | Pdzd2                       | PDZ domain containing 2                                                                             |
| 1456123_at   | 1.7775337 | Up | AI481121                    | expressed sequence AI481121                                                                         |
| 1423551_at   | 1.777498  | Up | Cdh13                       | cadherin 13                                                                                         |
| 1456722_at   | 1.7747763 | Up | Chrdl1                      | chordin-like 1                                                                                      |
| 1430036_at   | 1.771898  | Up | 2310015B20Rik               | RIKEN cDNA 2310015B20 gene                                                                          |
| 1418493_a_at | 1.7710798 | Up | Snca                        | synuclein, alpha                                                                                    |
| 1443749_x_at | 1.7691233 | Up | Slc1a3                      | solute carrier family 1 (glial high affinity<br>glutamate transporter), member 3                    |
| 1455365_at   | 1.7658752 | Up | Cdh8                        | cadherin 8                                                                                          |
| 1455034_at   | 1.7657745 | Up | Nr4a2                       | nuclear receptor subfamily 4, group A,<br>member 2                                                  |
| 1457072_at   | 1.7627686 | Up | Bcl11a                      | B-cell CLL/lymphoma 11A (zinc finger<br>protein)                                                    |
| 1439808_at   | 1.7621288 | Up | A130090K04Rik               | RIKEN cDNA A130090K04 gene                                                                          |
| 1418934_at   | 1.7540219 | Up | Mab21I2                     | mab-21-like 2 ( <i>C. elegans</i> )                                                                 |
| 1451499_at   | 1.7526492 | Up | Cadps2                      | Ca <sup>2+</sup> -dependent activator protein for<br>secretion 2                                    |
| 1433716_x_at | 1.7517176 | Up | Gfra2                       | glial cell line derived neurotrophic factor<br>family receptor alpha 2                              |
| 1419639_at   | 1.7514428 | Up | Efnb2                       | ephrin B2                                                                                           |
| 1418762_at   | 1.7504878 | Up | Cd55                        | CD55 antigen                                                                                        |
| 1453282_at   | 1.7370312 | Up | Cxadr                       | coxsackie virus and adenovirus receptor                                                             |
| 1433529_at   | 1.7367507 | Up | E430002G05Rik               | RIKEN cDNA E430002G05 gene                                                                          |
| 1438662_at   | 1.7324018 | Up | Ajap1                       | adherens junction associated protein 1                                                              |
| 1451450_at   | 1.7298579 | Up | 2010011I20Rik               | RIKEN cDNA 2010011I20 gene                                                                          |
| 1423062_at   | 1.7277421 | Up | Igfbp3                      | insulin-like growth factor binding protein 3                                                        |
| 1434802_s_at | 1.7267414 | Up | Ntf3                        | neurotrophin 3                                                                                      |
| 1418868_at   | 1.7265222 | Up | En2                         | engrailed 2                                                                                         |
| 1419638_at   | 1.7229978 | Up | Efnb2                       | ephrin B2                                                                                           |
| 1424067_at   | 1.720637  | Up | Icam1                       | intercellular adhesion molecule 1                                                                   |
| 1436359_at   | 1.713911  | Up | Ret                         | ret proto-oncogene                                                                                  |
| 1450749_a_at | 1.7138649 | Up | Nr4a2                       | nuclear receptor subfamily 4, group A,<br>member 2                                                  |
| 1452202_at   | 1.7138015 | Up | Pde2a                       | phosphodiesterase 2A, cGMP-stimulated                                                               |
| 1455416_at   | 1.7118311 | Up | C130021I20Rik               | Riken cDNA C130021I20 gene                                                                          |
| 1457008_at   | 1.7110441 | Up | Chrn4                       | cholinergic receptor, nicotinic, beta<br>polypeptide 4                                              |
| 1416008_at   | 1.708343  | Up | Satb1                       | special AT-rich sequence binding protein 1                                                          |
| 1424679_at   | 1.7036554 | Up | Mab21I1                     | mab-21-like 1 ( <i>C. elegans</i> )                                                                 |
| 1451023_at   | 1.6997546 | Up | Hcn3                        | hyperpolarization-activated, cyclic<br>nucleotide-gated K <sup>+</sup> 3                            |
| 1448436_a_at | 1.6956029 | Up | Irf1                        | interferon regulatory factor 1                                                                      |

|              |           |    |                        |                                                                                                                  |
|--------------|-----------|----|------------------------|------------------------------------------------------------------------------------------------------------------|
| 1440456_at   | 1.6901668 | Up | Dnahc7a                | dynein, axonemal, heavy chain 7A                                                                                 |
| 1419085_at   | 1.6890106 | Up | Pcp2                   | Purkinje cell protein 2 (L7)                                                                                     |
| 1445129_at   | 1.6855676 | Up |                        |                                                                                                                  |
| 1438456_at   | 1.6842091 | Up | H13                    | histocompatibility 13                                                                                            |
| 1449939_s_at | 1.6826832 | Up | Dlk1                   | delta-like 1 homolog (Drosophila)                                                                                |
| 1459306_at   | 1.6806967 | Up |                        |                                                                                                                  |
| 1429622_at   | 1.677523  | Up | Cand2                  | cullin-associated and neddylation-dissociated 2 (putative)                                                       |
| 1416271_at   | 1.6755182 | Up | Perp                   | PERP, TP53 apoptosis effector                                                                                    |
| 1423422_at   | 1.6718394 | Up | Asb4                   | ankyrin repeat and SOCS box-containing 4                                                                         |
| 1432556_a_at | 1.6696161 | Up | 3100002J23Rik          | RIKEN cDNA 3100002J23 gene                                                                                       |
| 1455238_at   | 1.6693113 | Up | Mum11                  | melanoma associated antigen (mutated) 1-like 1                                                                   |
| 1440911_at   | 1.668121  | Up | Col23a1                | collagen, type XXIII, alpha 1                                                                                    |
| 1418847_at   | 1.6665175 | Up | Arg2                   | arginase type II                                                                                                 |
| 1426215_at   | 1.6636685 | Up | Ddc                    | dopa decarboxylase                                                                                               |
| 1426340_at   | 1.6629692 | Up | Slc1a3                 | solute carrier family 1 (glial high affinity glutamate transporter), member 3                                    |
| 1459847_x_at | 1.662883  | Up | Gfra2                  | glial cell line derived neurotrophic factor family receptor alpha 2                                              |
| 1453102_at   | 1.6613677 | Up | Flrt3 /// LOC100048721 | fibronectin leucine rich transmembrane protein 3 /// similar to fibronectin leucine rich transmembrane protein 3 |
| 1421595_at   | 1.6605097 | Up | Fam184b                | family with sequence similarity 184, member B                                                                    |
| 1456642_x_at | 1.6554    | Up | S100a10                | S100 calcium binding protein A10 (calpactin)                                                                     |
| 1428444_at   | 1.6536677 | Up | Asb2                   | ankyrin repeat and SOCS box-containing 2                                                                         |
| 1418957_at   | 1.6522067 | Up | Stac                   | src homology three (SH3) and cysteine rich domain                                                                |
| 1417677_at   | 1.6504122 | Up | Opn3                   | opsin 3                                                                                                          |
| 1452473_at   | 1.6442739 | Up | Prr15                  | proline rich 15                                                                                                  |
| 1438470_at   | 1.6442543 | Up | Socs2                  | suppressor of cytokine signaling 2                                                                               |
| 1444970_at   | 1.6439086 | Up | C79870                 | expressed sequence C79870                                                                                        |
| 1428785_at   | 1.6417966 | Up | Amotl1                 | angiomin-like 1                                                                                                  |
| 1425926_a_at | 1.6415231 | Up | Otx2                   | orthodenticle homolog 2 (Drosophila)                                                                             |
| 1439568_at   | 1.6413953 | Up | Greb1 /// LOC100045413 | gene regulated by estrogen in breast cancer protein /// similar to Greb1 protein                                 |
| 1440177_at   | 1.6398797 | Up | 9630027E11 /// Grik3   | hypothetical protein 9630027E11 /// glutamate receptor, ionotropic, kainate 3                                    |
| 1422642_at   | 1.6376499 | Up | Cdc42ep3               | CDC42 effector protein (Rho GTPase binding) 3                                                                    |
| 1419477_at   | 1.6373031 | Up | Clec2d                 | C-type lectin domain family 2, member d                                                                          |
| 1417962_s_at | 1.6361214 | Up | Ghr                    | growth hormone receptor                                                                                          |
| 1420965_a_at | 1.6360092 | Up | Enc1                   | ectodermal-neural cortex 1                                                                                       |
| 1451112_s_at | 1.6348406 | Up | Dap                    | death-associated protein                                                                                         |

|              |           |    |                                                                                                                                                |                                                                                                                                                                                                                                                                      |
|--------------|-----------|----|------------------------------------------------------------------------------------------------------------------------------------------------|----------------------------------------------------------------------------------------------------------------------------------------------------------------------------------------------------------------------------------------------------------------------|
| 1442724_at   | 1.6344196 | Up | Dlk1                                                                                                                                           | delta-like 1 homolog (Drosophila)                                                                                                                                                                                                                                    |
| 1417043_at   | 1.6278259 | Up | Lcat                                                                                                                                           | lecithin cholesterol acyltransferase                                                                                                                                                                                                                                 |
| 1459994_x_at | 1.6238517 | Up | Trfr2                                                                                                                                          | transferrin receptor 2                                                                                                                                                                                                                                               |
| 1438009_at   | 1.622522  | Up | Hist1h2ab /// Hist1h2ac<br>/// Hist1h2ad ///<br>Hist1h2ae /// Hist1h2ag<br>/// Hist1h2ai /// Hist1h2an<br>/// Hist1h2ao /// RP23-<br>480B19.10 | histone cluster 1, H2ab /// histone cluster<br>1, H2ac /// histone cluster 1, H2ad ///<br>histone cluster 1, H2ae /// histone cluster<br>1, H2ag /// histone cluster 1, H2ai ///<br>histone cluster 1, H2an /// histone cluster<br>1, H2ao /// similar to histone 2a |
| 1439204_at   | 1.6223154 | Up | Scn3a                                                                                                                                          | sodium channel, voltage-gated, type III,<br>alpha                                                                                                                                                                                                                    |
| 1416674_at   | 1.6222103 | Up | Ptpru                                                                                                                                          | protein tyrosine phosphatase, receptor<br>type, U                                                                                                                                                                                                                    |
| 1436275_at   | 1.6222006 | Up | Kcni2                                                                                                                                          | Kv channel-interacting protein 2                                                                                                                                                                                                                                     |
| 1454869_at   | 1.6204101 | Up | Wdr40b                                                                                                                                         | WD repeat domain 40B                                                                                                                                                                                                                                                 |
| 1447182_at   | 1.6192892 | Up | C77815                                                                                                                                         | expressed sequence C77815                                                                                                                                                                                                                                            |
| 1427155_at   | 1.6101992 | Up | Fchsd1                                                                                                                                         | FCH and double SH3 domains 1                                                                                                                                                                                                                                         |
| 1455119_at   | 1.609856  | Up | Ppapdc1a                                                                                                                                       | phosphatidic acid phosphatase type 2<br>domain containing 1A                                                                                                                                                                                                         |
| 1455918_at   | 1.6089259 | Up | Adrb3                                                                                                                                          | adrenergic receptor, beta 3                                                                                                                                                                                                                                          |
| 1424367_a_at | 1.6083498 | Up | Homer2                                                                                                                                         | homer homolog 2 (Drosophila)                                                                                                                                                                                                                                         |
| 1422052_at   | 1.6077404 | Up | Cdh8                                                                                                                                           | cadherin 8                                                                                                                                                                                                                                                           |
| 1456180_at   | 1.6076146 | Up | Rbm24                                                                                                                                          | RNA binding motif protein 24                                                                                                                                                                                                                                         |
| 1428374_at   | 1.6068869 | Up | Glce                                                                                                                                           | glucuronyl C5-epimerase                                                                                                                                                                                                                                              |
| 1458814_at   | 1.6061257 | Up | AU022855                                                                                                                                       | expressed sequence AU022855                                                                                                                                                                                                                                          |
| 1454752_at   | 1.6044868 | Up | Rbm24                                                                                                                                          | RNA binding motif protein 24                                                                                                                                                                                                                                         |
| 1434470_at   | 1.6034775 | Up | Syt13                                                                                                                                          | synaptotagmin XIII                                                                                                                                                                                                                                                   |
| 1453093_at   | 1.6018263 | Up | Rasgef1c                                                                                                                                       | RasGEF domain family, member 1C                                                                                                                                                                                                                                      |
| 1422037_at   | 1.6010566 | Up | Dlx3                                                                                                                                           | distal-less homeobox 3                                                                                                                                                                                                                                               |
| 1436853_a_at | 1.5954702 | Up | Snca                                                                                                                                           | synuclein, alpha                                                                                                                                                                                                                                                     |
| 1436182_at   | 1.5949404 | Up |                                                                                                                                                |                                                                                                                                                                                                                                                                      |
| 1455970_at   | 1.5940446 | Up |                                                                                                                                                |                                                                                                                                                                                                                                                                      |
| 1460159_at   | 1.5937691 | Up | Mysm1                                                                                                                                          | myb-like, SWIRM and MPN domains 1<br>family with sequence similarity 102,<br>member B                                                                                                                                                                                |
| 1434828_at   | 1.5935757 | Up | Fam102b                                                                                                                                        |                                                                                                                                                                                                                                                                      |
| 1434685_at   | 1.58843   | Up | D3Bwg0562e                                                                                                                                     | DNA segment, Chr 3, Brigham & Women's<br>Genetics 0562 expressed                                                                                                                                                                                                     |
| 1459894_at   | 1.5869296 | Up | Iqgap2                                                                                                                                         | IQ motif containing GTPase activating<br>protein 2                                                                                                                                                                                                                   |
| 1438133_a_at | 1.58072   | Up | Cyr61                                                                                                                                          | cysteine rich protein 61                                                                                                                                                                                                                                             |
| 1433987_at   | 1.580328  | Up | Hpcal4                                                                                                                                         | hippocalcin-like 4                                                                                                                                                                                                                                                   |
| 1422109_at   | 1.580049  | Up | Rfx1                                                                                                                                           | regulatory factor X, 1 (influences HLA<br>class II expression)                                                                                                                                                                                                       |
| 1435125_at   | 1.5789719 | Up |                                                                                                                                                |                                                                                                                                                                                                                                                                      |
| 1457347_at   | 1.5789703 | Up | Ryr1                                                                                                                                           | ryanodine receptor 1, skeletal muscle                                                                                                                                                                                                                                |
| 1452407_at   | 1.576035  | Up | Spag4                                                                                                                                          | sperm associated antigen 4                                                                                                                                                                                                                                           |
| 1438575_a_at | 1.575552  | Up |                                                                                                                                                |                                                                                                                                                                                                                                                                      |

|              |           |    |               |                                                                                               |
|--------------|-----------|----|---------------|-----------------------------------------------------------------------------------------------|
| 1458366_at   | 1.5728172 | Up | Asxl2         | Additional sex combs like 2 ( <i>Drosophila</i> ), mRNA (cDNA clone MGC:176101 IMAGE:9055752) |
| 1450700_at   | 1.5723724 | Up | Cdc42ep3      | CDC42 effector protein (Rho GTPase binding) 3                                                 |
| 1451775_s_at | 1.5721519 | Up | Il13ra1       | interleukin 13 receptor, alpha 1                                                              |
| 1433854_at   | 1.5714246 | Up | Tmem164       | CDNA clone IMAGE:6815971                                                                      |
| 1431751_a_at | 1.5708989 | Up | Mpped2        | metallophosphoesterase domain containing 2                                                    |
| 1453772_at   | 1.5689534 | Up | Syngn1        | synaptogyrin 1                                                                                |
| 1449241_at   | 1.5672234 | Up | Klh1          | kelch-like 1 ( <i>Drosophila</i> )                                                            |
| 1415972_at   | 1.5636109 | Up | Marcks        | myristoylated alanine rich protein kinase C substrate                                         |
| 1454622_at   | 1.5635604 | Up | Slc38a5       | solute carrier family 38, member 5                                                            |
| 1430210_at   | 1.5630816 | Up | C330024D12Rik | RIKEN cDNA C330024D12 gene                                                                    |
| 1435285_at   | 1.5622306 | Up | Mpped2        | metallophosphoesterase domain containing 2                                                    |
| 1455247_at   | 1.560091  | Up | Amotl1        | angiominin-like 1                                                                             |
| 1434098_at   | 1.56009   | Up | Glr2          | glycine receptor, alpha 2 subunit                                                             |
| 1450852_s_at | 1.5590885 | Up | F2r           | coagulation factor II (thrombin) receptor                                                     |
| 1419156_at   | 1.5586221 | Up | Sox4          | SRY-box containing gene 4                                                                     |
| 1417676_a_at | 1.5579439 | Up | Ptpro         | protein tyrosine phosphatase, receptor type, O                                                |
| 1424445_at   | 1.5575364 | Up | Tm4sf5        | transmembrane 4 superfamily member 5                                                          |
| 1416762_at   | 1.5568894 | Up | S100a10       | S100 calcium binding protein A10 (calpactin)                                                  |
| 1449843_at   | 1.5567697 | Up | St8sia2       | ST8 alpha-N-acetyl-neuraminide alpha-2,8-sialyltransferase 2                                  |
| 1419968_at   | 1.5565042 | Up | C77370        | expressed sequence C77370                                                                     |
| 1450967_at   | 1.5541344 | Up | Ptplad2       | protein tyrosine phosphatase-like A domain containing 2                                       |
| 1457046_s_at | 1.5536314 | Up | C77370        | expressed sequence C77370                                                                     |
| 1428765_at   | 1.5528535 | Up | Meg3          | maternally expressed 3                                                                        |
| 1417109_at   | 1.5527397 | Up | Tinagl1       | tubulointerstitial nephritis antigen-like 1                                                   |
| 1455735_at   | 1.5524896 | Up | Ap1s3         | adaptor-related protein complex AP-1, sigma 3                                                 |
| 1451583_a_at | 1.5523838 | Up | Mmgt2         | membrane magnesium transporter 2                                                              |
| 1447707_s_at | 1.550929  | Up | Pde2a         | phosphodiesterase 2A, cGMP-stimulated                                                         |
| 1440683_at   | 1.5485262 | Up | A930004D18Rik | RIKEN cDNA A930004D18 gene                                                                    |
| 1448169_at   | 1.5472023 | Up | Krt18         | keratin 18                                                                                    |
| 1428927_at   | 1.5455942 | Up | Shq1          | SHQ1 homolog ( <i>S. cerevisiae</i> )                                                         |
| 1433885_at   | 1.5440698 | Up | Iqgap2        | IQ motif containing GTPase activating protein 2                                               |
| 1449154_at   | 1.5410964 | Up | Col11a1       | collagen, type XI, alpha 1                                                                    |
| 1433575_at   | 1.5405136 | Up | Sox4          | SRY-box containing gene 4                                                                     |
| 1439794_at   | 1.540297  | Up |               |                                                                                               |
| 1428861_at   | 1.5398382 | Up | Filip1l       | filamin A interacting protein 1-like                                                          |
| 1446791_at   | 1.5387299 | Up |               |                                                                                               |

|              |           |    |                       |                                                                                         |
|--------------|-----------|----|-----------------------|-----------------------------------------------------------------------------------------|
| 1451863_at   | 1.5380356 | Up | Uts2r                 | urotensin 2 receptor                                                                    |
| 1454783_at   | 1.5372832 | Up | Il13ra1               | interleukin 13 receptor, alpha 1                                                        |
| 1428021_at   | 1.5368217 | Up | Mccc2                 | methylcrotonoyl-Coenzyme A carboxylase 2 (beta)                                         |
| 1437417_s_at | 1.5364466 | Up | Gpc6 /// LOC100045283 | glypican 6 /// similar to Glypican 6                                                    |
| 1450061_at   | 1.5364088 | Up | Enc1                  | ectodermal-neural cortex 1                                                              |
| 1427107_at   | 1.5360421 | Up | Slc16a11              | solute carrier family 16 (monocarboxylic acid transporters), member 11                  |
| 1459665_s_at | 1.5357426 | Up | Mrv1                  | MRV integration site 1                                                                  |
| 1437034_x_at | 1.5323119 | Up | Marcks                | myristoylated alanine rich protein kinase C substrate                                   |
| 1438257_at   | 1.5319103 | Up |                       |                                                                                         |
| 1455540_at   | 1.53174   | Up | Cps1                  | carbamoyl-phosphate synthetase 1                                                        |
| 1440589_at   | 1.5314581 | Up |                       |                                                                                         |
| 1416025_at   | 1.5308375 | Up | Fgg                   | fibrinogen, gamma polypeptide                                                           |
| 1425470_at   | 1.5307047 | Up |                       |                                                                                         |
| 1449178_at   | 1.5302672 | Up | Pdlim3                | PDZ and LIM domain 3                                                                    |
| 1417704_a_at | 1.529264  | Up | Arhgap6               | Rho GTPase activating protein 6                                                         |
| 1425175_at   | 1.5290182 | Up | C1ql3                 | C1q-like 3                                                                              |
| 1457823_at   | 1.5284975 | Up | Cyr61                 | cysteine rich protein 61                                                                |
| 1434583_at   | 1.5245005 | Up | Tmem26                | transmembrane protein 26                                                                |
| 1452148_at   | 1.5241073 | Up | Lrpap1                | low density lipoprotein receptor-related protein associated protein 1                   |
| 1431617_at   | 1.521239  | Up | 4933405E24Rik         | RIKEN cDNA 4933405E24 gene                                                              |
| 1438841_s_at | 1.5208722 | Up | Arg2                  | arginase type II                                                                        |
| 1417312_at   | 1.5202004 | Up | Dkk3                  | dickkopf homolog 3 ( <i>Xenopus laevis</i> )                                            |
| 1433944_at   | 1.5194346 | Up | Hectd2                | HECT domain containing 2                                                                |
| 1442555_at   | 1.5175948 | Up | Kcnd3                 | potassium voltage-gated channel, Shal-related family, member 3                          |
| 1423812_s_at | 1.51685   | Up | AW146242              | expressed sequence AW146242                                                             |
| 1459993_at   | 1.5161444 | Up |                       |                                                                                         |
| 1446389_at   | 1.5160809 | Up |                       |                                                                                         |
| 1453172_at   | 1.5150595 | Up | Hspa13                | heat shock protein 70 family, member 13                                                 |
| 1442166_at   | 1.5137258 | Up | Cpne5                 | copine V                                                                                |
| 1440487_at   | 1.5133146 | Up | Dcc                   | deleted in colorectal carcinoma radial spoke head 10 homolog B ( <i>Chlamydomonas</i> ) |
| 1445576_at   | 1.5108254 | Up | Rsph10b2              |                                                                                         |
| 1418257_at   | 1.5090921 | Up | Slc12a7               | solute carrier family 12, member 7                                                      |
| 1437226_x_at | 1.5084283 | Up | Marcks1               | MARCKS-like 1                                                                           |
| 1441572_at   | 1.5067456 | Up | Dcc                   | deleted in colorectal carcinoma                                                         |
| 1456512_at   | 1.5059689 | Up | Pdzrn4                | PDZ domain containing RING finger 4                                                     |
| 1417263_at   | 1.5059327 | Up | Ptgs2                 | prostaglandin-endoperoxide synthase 2                                                   |
| 1425381_a_at | 1.5059073 | Up | Trfr2                 | transferrin receptor 2                                                                  |
| 1438576_x_at | 1.5055757 | Up |                       |                                                                                         |
| 1417022_at   | 1.5052674 | Up | Slc7a3                | solute carrier family 7 (cationic amino acid                                            |

|              |           |    |                                |                                                                                                                                         |
|--------------|-----------|----|--------------------------------|-----------------------------------------------------------------------------------------------------------------------------------------|
|              |           |    |                                | transporter, y+ system), member 3                                                                                                       |
| 1454806_at   | 1.5044953 | Up | Fam49a                         | family with sequence similarity 49, member B                                                                                            |
| 1424807_at   | 1.5032468 | Up | Lama4                          | laminin, alpha 4                                                                                                                        |
| 1456247_x_at | 1.502681  | Up | Plp2                           | proteolipid protein 2                                                                                                                   |
| 1437522_x_at | 1.5023501 | Up | Gh                             | growth hormone                                                                                                                          |
| 1437631_at   | 1.5019226 | Up | Kcnp4                          | Kv channel interacting protein 4                                                                                                        |
| 1437405_a_at | 1.5003332 | Up | Igfbp4                         | insulin-like growth factor binding protein 4                                                                                            |
| 1433607_at   | 1.500161  | Up | Cbln4                          | cerebellin 4 precursor protein                                                                                                          |
| 1458692_at   | 1.4993296 | Up |                                |                                                                                                                                         |
| 1421422_at   | 1.4992616 | Up | 5033411D12Rik                  | RIKEN cDNA 5033411D12 gene                                                                                                              |
| 1455489_at   | 1.4991502 | Up | Lrrtm2                         | leucine rich repeat transmembrane neuronal 2                                                                                            |
| 1418497_at   | 1.499058  | Up | Fgf13                          | fibroblast growth factor 13                                                                                                             |
| 1429402_at   | 1.4986705 | Up | Glt8d2                         | glycosyltransferase 8 domain containing 2                                                                                               |
| 1450139_at   | 1.4986243 | Up | Ern2                           | endoplasmic reticulum (ER) to nucleus signalling 2                                                                                      |
| 1426353_at   | 1.4985538 | Up | Stat6                          | signal transducer and activator of transcription 6                                                                                      |
| 1428647_at   | 1.4981245 | Up | LOC676870 /// Pbx1             | region containing RIKEN cDNA 2310056B04 gene; pre B-cell leukemia transcription factor 1 /// pre B-cell leukemia transcription factor 1 |
| 1449158_at   | 1.4980116 | Up | Kcnk2                          | potassium channel, subfamily K, member 2                                                                                                |
| 1428994_s_at | 1.4978852 | Up | 1110017116Rik                  | RIKEN cDNA 1110017116 gene                                                                                                              |
| 1433306_at   | 1.4968022 | Up | 4930456K20Rik                  | RIKEN cDNA 4930456K20 gene                                                                                                              |
| 1427511_at   | 1.496412  | Up |                                |                                                                                                                                         |
| 1439006_x_at | 1.4950204 | Up | Fam70a                         | family with sequence similarity 70, member A                                                                                            |
| 1425078_x_at | 1.4946569 | Up | C130026I21Rik /// LOC100041885 | RIKEN cDNA C130026I21 gene /// similar to C130026I21Rik protein                                                                         |
| 1444840_at   | 1.493143  | Up | C87487                         | expressed sequence C87487                                                                                                               |
| 1429298_at   | 1.492103  | Up | Ddah1                          | dimethylarginine dimethylaminohydrolase 1                                                                                               |
| 1427247_at   | 1.4915609 | Up | D3Bwg0562e                     | DNA segment, Chr 3, Brigham & Women's Genetics 0562 expressed                                                                           |
| 1438379_x_at | 1.4912577 | Up | 2310007F21Rik                  | RIKEN cDNA 2310007F21 gene                                                                                                              |
| 1427312_at   | 1.4908887 | Up | Cmya5                          | cardiomyopathy associated 5                                                                                                             |
| 1455234_at   | 1.4907293 | Up | B3galt1                        | UDP-Gal:betaGlcNAc beta 1,3-galactosyltransferase, polypeptide 1                                                                        |
| 1436821_at   | 1.4907205 | Up | Plcx3                          | phosphatidylinositol-specific phospholipase C, X domain containing 3                                                                    |
| 1444558_at   | 1.4904909 | Up |                                |                                                                                                                                         |
| 1428319_at   | 1.4903791 | Up | Pdlim7                         | PDZ and LIM domain 7                                                                                                                    |
| 1446828_at   | 1.4870532 | Up |                                |                                                                                                                                         |
| 1435190_at   | 1.4867765 | Up | Chl1                           | cell adhesion molecule with homology to L1CAM                                                                                           |
| 1426758_s_at | 1.4856683 | Up | Meg3                           | maternally expressed 3                                                                                                                  |

|              |           |    |                        |                                                                                    |
|--------------|-----------|----|------------------------|------------------------------------------------------------------------------------|
| 1424030_at   | 1.4853804 | Up | Grhl1 /// LOC100043996 | grainyhead-like 1 ( <i>Drosophila</i> ) /// similar to Grhl1 protein               |
| 1453418_at   | 1.4850934 | Up | Col24a1                | collagen, type XXIV, alpha 1                                                       |
| 1438310_at   | 1.4840958 | Up |                        |                                                                                    |
| 1448216_at   | 1.4828877 | Up | Syng3                  | synaptogyrin 3                                                                     |
| 1422692_at   | 1.481833  | Up | Sub1                   | SUB1 homolog ( <i>S. cerevisiae</i> )                                              |
| 1456596_at   | 1.4787209 | Up | Fam70a                 | family with sequence similarity 70, member A                                       |
| 1442101_at   | 1.478417  | Up | Elfn1                  | leucine rich repeat and fibronectin type III, extracellular 1                      |
| 1423852_at   | 1.4768808 | Up | Shisa2                 | shisa homolog 2 ( <i>Xenopus laevis</i> )                                          |
| 1441384_at   | 1.4759248 | Up | Gad1                   | glutamate decarboxylase-like 1                                                     |
| 1434857_at   | 1.4757786 | Up | A230106D06Rik          | RIKEN cDNA A230106D06 gene                                                         |
| 1430230_at   | 1.4757309 | Up | Rcsd1                  | RCSD domain containing 1                                                           |
| 1446952_at   | 1.4751726 | Up | D11ErtD506e            | DNA segment, Chr 11, ERATO Doi 506, expressed                                      |
| 1416098_at   | 1.4731517 | Up | Syng3                  | synaptogyrin 3                                                                     |
| 1426756_at   | 1.4721859 | Up | Galnt2                 | UDP-N-acetyl-alpha-D-galactosamine:polypeptide N-acetylgalactosaminyltransferase 2 |
| 1456197_x_at | 1.4713638 | Up | Ajap1                  | Adherens junction associated protein 1, mRNA (cDNA clone MGC:182386 IMAGE:9056280) |
| 1442609_at   | 1.4704452 | Up |                        |                                                                                    |
| 1452415_at   | 1.4693041 | Up | Actn1                  | actinin, alpha 1                                                                   |
| 1428074_at   | 1.4680412 | Up | Tmem158                | transmembrane protein 158                                                          |
| 1439777_at   | 1.4669615 | Up | Cugbp2                 | CUG triplet repeat, RNA binding protein 2                                          |
| 1428499_at   | 1.4669166 | Up | 2810454L23Rik          | RIKEN cDNA 2810454L23 gene                                                         |
| 1435627_x_at | 1.466194  | Up | 668321 /// Marcks1     | predicted gene, 668321 /// MARCKS-like 1                                           |
| 1458349_s_at | 1.4658045 | Up |                        |                                                                                    |
| 1439888_at   | 1.4653491 | Up |                        |                                                                                    |
| 1427413_a_at | 1.4651767 | Up | Cugbp1                 | CUG triplet repeat, RNA binding protein 1                                          |
| 1432509_at   | 1.4626149 | Up | 5033430I15Rik          | RIKEN cDNA 5033430I15 gene                                                         |
| 1443567_at   | 1.4616401 | Up | BC032203               | cDNA sequence BC032203                                                             |
| 1434115_at   | 1.4598144 | Up | Cdh13                  | cadherin 13                                                                        |
| 1424145_at   | 1.4585243 | Up | Prr3                   | proline-rich polypeptide 3                                                         |
| 1443408_at   | 1.4582673 | Up |                        |                                                                                    |
| 1438968_x_at | 1.4576685 | Up | Spint2                 | serine protease inhibitor, Kunitz type 2                                           |
| 1419710_at   | 1.4573756 | Up | Nxph3                  | neurexophilin 3                                                                    |
| 1418301_at   | 1.4567301 | Up | Irf6                   | interferon regulatory factor 6                                                     |
| 1436260_at   | 1.4564286 | Up |                        |                                                                                    |
| 1447795_at   | 1.4559544 | Up | Bspry                  | B-box and SPRY domain containing                                                   |
| 1440468_at   | 1.454797  | Up | D630023F18Rik          | RIKEN cDNA D630023F18 gene                                                         |
| 1455701_at   | 1.4521872 | Up | Snx26                  | sorting nexin 26                                                                   |
| 1429790_at   | 1.4520029 | Up | Bruno16                | bruno-like 6, RNA binding protein ( <i>Drosophila</i> )                            |



|              |           |    |                                                                                                                                                                                                                                        |                                                                                                                                                                                                                                                                                                                                                                                                       |
|--------------|-----------|----|----------------------------------------------------------------------------------------------------------------------------------------------------------------------------------------------------------------------------------------|-------------------------------------------------------------------------------------------------------------------------------------------------------------------------------------------------------------------------------------------------------------------------------------------------------------------------------------------------------------------------------------------------------|
| 1456937_at   | 1.4518137 | Up | Cdh26                                                                                                                                                                                                                                  | cadherin-like 26                                                                                                                                                                                                                                                                                                                                                                                      |
| 1426231_at   | 1.4499255 | Up | Vit                                                                                                                                                                                                                                    | vitrin                                                                                                                                                                                                                                                                                                                                                                                                |
| 1424356_a_at | 1.449864  | Up | Metrn1                                                                                                                                                                                                                                 | meteorin, glial cell differentiation regulator-like                                                                                                                                                                                                                                                                                                                                                   |
| 1436465_at   | 1.4495344 | Up | Klhl1                                                                                                                                                                                                                                  | kelch-like 1 (Drosophila)                                                                                                                                                                                                                                                                                                                                                                             |
| 1417377_at   | 1.4492843 | Up | Cadm1                                                                                                                                                                                                                                  | cell adhesion molecule 1                                                                                                                                                                                                                                                                                                                                                                              |
| 1453354_at   | 1.4484876 | Up | Ndufs1                                                                                                                                                                                                                                 | NADH dehydrogenase (ubiquinone) Fe-S protein 1                                                                                                                                                                                                                                                                                                                                                        |
| 1425374_at   | 1.4483262 | Up | Oas3                                                                                                                                                                                                                                   | 2'-5' oligoadenylate synthetase 3                                                                                                                                                                                                                                                                                                                                                                     |
| 1424958_at   | 1.4482144 | Up | Car8 /// LOC676792                                                                                                                                                                                                                     | carbonic anhydrase 8 /// similar to Carbonic anhydrase-related protein (CARP) (CA-VIII)                                                                                                                                                                                                                                                                                                               |
| 1426864_a_at | 1.4472594 | Up | Ncam1                                                                                                                                                                                                                                  | neural cell adhesion molecule 1                                                                                                                                                                                                                                                                                                                                                                       |
| 1458834_at   | 1.4467461 | Up |                                                                                                                                                                                                                                        |                                                                                                                                                                                                                                                                                                                                                                                                       |
| 1435415_x_at | 1.4462866 | Up | Marcks1                                                                                                                                                                                                                                | MARCKS-like 1                                                                                                                                                                                                                                                                                                                                                                                         |
| 1447769_x_at | 1.4456441 | Up | Amigo2                                                                                                                                                                                                                                 | adhesion molecule with Ig like domain 2                                                                                                                                                                                                                                                                                                                                                               |
| 1454926_at   | 1.445626  | Up | Sphkap                                                                                                                                                                                                                                 | SPHK1 interactor, AKAP domain containing                                                                                                                                                                                                                                                                                                                                                              |
| 1456357_at   | 1.4454665 | Up | A930041I02Rik                                                                                                                                                                                                                          | RIKEN cDNA A930041I02 gene                                                                                                                                                                                                                                                                                                                                                                            |
| 1451867_x_at | 1.4450359 | Up | Arhgap6                                                                                                                                                                                                                                | Rho GTPase activating protein 6                                                                                                                                                                                                                                                                                                                                                                       |
| 1439334_at   | 1.4449083 | Up |                                                                                                                                                                                                                                        |                                                                                                                                                                                                                                                                                                                                                                                                       |
| 1451021_a_at | 1.4445472 | Up | Klf5                                                                                                                                                                                                                                   | Kruppel-like factor 5                                                                                                                                                                                                                                                                                                                                                                                 |
| 1450757_at   | 1.4437927 | Up | Cdh11                                                                                                                                                                                                                                  | cadherin 11                                                                                                                                                                                                                                                                                                                                                                                           |
| 1440118_at   | 1.4437672 | Up | Slc25a39                                                                                                                                                                                                                               | solute carrier family 25, member 39                                                                                                                                                                                                                                                                                                                                                                   |
| 1448594_at   | 1.4436008 | Up | Wisp1                                                                                                                                                                                                                                  | WNT1 inducible signaling pathway protein 1                                                                                                                                                                                                                                                                                                                                                            |
| 1417741_at   | 1.4427385 | Up | Pygl                                                                                                                                                                                                                                   | liver glycogen phosphorylase                                                                                                                                                                                                                                                                                                                                                                          |
| 1435805_at   | 1.4408371 | Up | Lin7a                                                                                                                                                                                                                                  | lin-7 homolog A (C. elegans)                                                                                                                                                                                                                                                                                                                                                                          |
| 1443392_at   | 1.4400741 | Up | Trpv1                                                                                                                                                                                                                                  | transient receptor potential cation channel, subfamily V, member 1                                                                                                                                                                                                                                                                                                                                    |
| 1452731_x_at | 1.4398159 | Up | 100041195 ///<br>100041874 ///<br>100042164 /// 666442 ///<br>666637 ///<br>B930046C15Rik ///<br>ENSMUSG00000063277<br>///<br>ENSMUSG00000068790<br>///<br>ENSMUSG00000072735<br>/// LOC100036568 ///<br>LOC100041530 ///<br>LOC671957 | predicted gene, 100041195 /// predicted gene, 100041874 /// predicted gene, 100042164 /// predicted gene, 666442 /// predicted gene, 666637 /// RIKEN cDNA B930046C15 gene /// predicted gene, ENSMUSG00000063277 /// predicted gene, ENSMUSG00000068790 /// predicted gene, ENSMUSG00000072735 /// hypothetical LOC100036568 /// similar to 1700001E04Rik protein /// hypothetical protein LOC671957 |
| 1455056_at   | 1.4392586 | Up | Lmo7                                                                                                                                                                                                                                   | LIM domain only 7                                                                                                                                                                                                                                                                                                                                                                                     |
| 1447708_x_at | 1.43884   | Up | Pde2a                                                                                                                                                                                                                                  | phosphodiesterase 2A, cGMP-stimulated                                                                                                                                                                                                                                                                                                                                                                 |
| 1442273_at   | 1.4387869 | Up | 4932413O14Rik                                                                                                                                                                                                                          | RIKEN cDNA 4932413O14 gene                                                                                                                                                                                                                                                                                                                                                                            |
| 1442614_at   | 1.4386626 | Up | Il1rap                                                                                                                                                                                                                                 | interleukin 1 receptor accessory protein                                                                                                                                                                                                                                                                                                                                                              |
| 1449876_at   | 1.438583  | Up | Prkg1                                                                                                                                                                                                                                  | protein kinase, cGMP-dependent, type I                                                                                                                                                                                                                                                                                                                                                                |

|              |           |    |                                                                                                                                                                                         |                                                                                                                                                                                                                                                                                                                                |
|--------------|-----------|----|-----------------------------------------------------------------------------------------------------------------------------------------------------------------------------------------|--------------------------------------------------------------------------------------------------------------------------------------------------------------------------------------------------------------------------------------------------------------------------------------------------------------------------------|
| 1425163_at   | 1.4379032 | Up | Al661453                                                                                                                                                                                | expressed sequence Al661453                                                                                                                                                                                                                                                                                                    |
| 1451335_at   | 1.4378779 | Up | Plac8                                                                                                                                                                                   | placenta-specific 8                                                                                                                                                                                                                                                                                                            |
| 1418298_s_at | 1.4365002 | Up | Dpysl4                                                                                                                                                                                  | dihydropyrimidinase-like 4                                                                                                                                                                                                                                                                                                     |
| 1423478_at   | 1.436329  | Up | Prkcb                                                                                                                                                                                   | protein kinase C, beta                                                                                                                                                                                                                                                                                                         |
| 1438344_at   | 1.4359518 | Up | 4833424O15Rik                                                                                                                                                                           | RIKEN cDNA 4833424O15 gene                                                                                                                                                                                                                                                                                                     |
| 1423602_at   | 1.4352864 | Up | Traf1                                                                                                                                                                                   | Tnf receptor-associated factor 1                                                                                                                                                                                                                                                                                               |
| 1423456_at   | 1.4350133 | Up | Bzw2                                                                                                                                                                                    | basic leucine zipper and W2 domains 2                                                                                                                                                                                                                                                                                          |
| 1442261_at   | 1.434876  | Up | Gpr150                                                                                                                                                                                  | G protein-coupled receptor 150                                                                                                                                                                                                                                                                                                 |
| 1425901_at   | 1.4337589 | Up | Nfatc2                                                                                                                                                                                  | nuclear factor of activated T-cells, cytoplasmic, calcineurin-dependent 2                                                                                                                                                                                                                                                      |
| 1427318_s_at | 1.4331636 | Up | Myof                                                                                                                                                                                    | myoferlin                                                                                                                                                                                                                                                                                                                      |
| 1447825_x_at | 1.4317456 | Up | Pcdh8                                                                                                                                                                                   | protocadherin 8                                                                                                                                                                                                                                                                                                                |
| 1423420_at   | 1.4315784 | Up | Adrb1                                                                                                                                                                                   | adrenergic receptor, beta 1                                                                                                                                                                                                                                                                                                    |
| 1454193_at   | 1.4307438 | Up | 5430401H09Rik                                                                                                                                                                           | RIKEN cDNA 5430401H09 gene                                                                                                                                                                                                                                                                                                     |
| 1417680_at   | 1.4306799 | Up | Kcna5                                                                                                                                                                                   | potassium voltage-gated channel, shaker-related subfamily, member 5                                                                                                                                                                                                                                                            |
| 1453424_at   | 1.429785  | Up | Fyco1                                                                                                                                                                                   | FYVE and coiled-coil domain containing 1                                                                                                                                                                                                                                                                                       |
| 1445110_at   | 1.4274068 | Up |                                                                                                                                                                                         |                                                                                                                                                                                                                                                                                                                                |
| 1441997_at   | 1.4268777 | Up | Zfp184                                                                                                                                                                                  | zinc finger protein 184 (Kruppel-like)                                                                                                                                                                                                                                                                                         |
| 1428301_at   | 1.426676  | Up | 100041195 ///<br>100041874 /// 544988 ///<br>666442 /// 666637 ///<br>ENSMUSG00000063277<br>///<br>ENSMUSG00000068790<br>///<br>ENSMUSG00000072735<br>/// LOC100036568 ///<br>LOC671957 | predicted gene, 100041195 /// predicted gene, 100041874 /// predicted gene, 544988 /// predicted gene, 666442 /// predicted gene, 666637 /// predicted gene, ENSMUSG00000063277 /// predicted gene, ENSMUSG00000068790 /// predicted gene, ENSMUSG00000072735 /// hypothetical LOC100036568 /// hypothetical protein LOC671957 |
| 1452207_at   | 1.4266478 | Up | Cited2                                                                                                                                                                                  | Cbp/p300-interacting transactivator, with Glu/Asp-rich carboxy-terminal domain, 2                                                                                                                                                                                                                                              |
| 1418286_a_at | 1.4256914 | Up | Efnb1                                                                                                                                                                                   | ephrin B1                                                                                                                                                                                                                                                                                                                      |
| 1441396_at   | 1.424596  | Up | B3galt1                                                                                                                                                                                 | UDP-Gal:betaGlcNAc beta 1,3-galactosyltransferase, polypeptide 1                                                                                                                                                                                                                                                               |
| 1424041_s_at | 1.424479  | Up | C1s /// LOC100044326                                                                                                                                                                    | complement component 1, s subcomponent /// similar to Complement component 1, s subcomponent                                                                                                                                                                                                                                   |
| 1434146_at   | 1.4240093 | Up | Gria2                                                                                                                                                                                   | glutamate receptor, ionotropic, AMPA2 (alpha 2)                                                                                                                                                                                                                                                                                |
| 1422631_at   | 1.4238509 | Up | Ahr                                                                                                                                                                                     | aryl-hydrocarbon receptor                                                                                                                                                                                                                                                                                                      |
| 1443982_at   | 1.4231638 | Up | Rgnef                                                                                                                                                                                   | Rho-guanine nucleotide exchange factor (Rgnef), mRNA                                                                                                                                                                                                                                                                           |
| 1424694_at   | 1.4230363 | Up | 2010011I20Rik                                                                                                                                                                           | RIKEN cDNA 2010011I20 gene                                                                                                                                                                                                                                                                                                     |
| 1423166_at   | 1.4226451 | Up | Cd36                                                                                                                                                                                    | CD36 antigen                                                                                                                                                                                                                                                                                                                   |
| 1454877_at   | 1.4225385 | Up | Sertad4                                                                                                                                                                                 | SERTA domain containing 4                                                                                                                                                                                                                                                                                                      |
| 1434889_at   | 1.4225011 | Up | Plekha7                                                                                                                                                                                 | pleckstrin homology domain containing, family A member 7                                                                                                                                                                                                                                                                       |
| 1431146_a_at | 1.4217652 | Up | Cpne8                                                                                                                                                                                   | copine VIII                                                                                                                                                                                                                                                                                                                    |
| 1441288_at   | 1.4217168 | Up |                                                                                                                                                                                         |                                                                                                                                                                                                                                                                                                                                |

|              |           |    |                |                                                                                               |
|--------------|-----------|----|----------------|-----------------------------------------------------------------------------------------------|
| 1426363_x_at | 1.421227  | Up | H2afy2         | H2A histone family, member Y2                                                                 |
| 1438132_at   | 1.4206125 | Up | C030005G22Rik  | RIKEN cDNA C030005G22 gene                                                                    |
| 1455172_at   | 1.4201072 | Up | AU020094       | expressed sequence AU020094                                                                   |
| 1417795_at   | 1.4198594 | Up | Chl1           | cell adhesion molecule with homology to L1CAM                                                 |
| 1430785_at   | 1.419306  | Up | Sdr9c7         | 4short chain dehydrogenase/reductase family 9C, member 7                                      |
| 1417561_at   | 1.4190549 | Up | Apoc1          | apolipoprotein C-I                                                                            |
| 1434438_at   | 1.4182289 | Up | Samhd1         | SAM domain and HD domain, 1                                                                   |
| 1435560_at   | 1.4181749 | Up | Itgal          | integrin alpha L                                                                              |
| 1457671_at   | 1.4176599 | Up | 9330120H11Rik  | RIKEN cDNA 9330120H11 gene                                                                    |
| 1425878_at   | 1.4172931 | Up | Cabp4          | calcium binding protein 4                                                                     |
| 1435424_x_at | 1.4160658 | Up |                |                                                                                               |
| 1417051_at   | 1.4147162 | Up | Pcdh8          | protocadherin 8                                                                               |
| 1420377_at   | 1.4145503 | Up | St8sia2        | ST8 alpha-N-acetyl-neuraminide alpha-2,8-sialyltransferase 2                                  |
| 1446884_at   | 1.4144003 | Up | AU022554       | expressed sequence AU022554                                                                   |
| 1428642_at   | 1.414232  | Up | Slc35d3        | solute carrier family 35, member D3                                                           |
| 1426973_at   | 1.414088  | Up | Gpr153         | G protein-coupled receptor 153                                                                |
| 1433434_at   | 1.4135543 | Up | AW551984       | expressed sequence AW551984                                                                   |
| 1423033_at   | 1.4122103 | Up | Stt3a          | STT3, subunit of the oligosaccharyltransferase complex, homolog A ( <i>S. cerevisiae</i> )    |
| 1439697_at   | 1.4118327 | Up | Il1rap         | interleukin 1 receptor accessory protein                                                      |
| 1419302_at   | 1.4117737 | Up | Heyl           | hairy/enhancer-of-split related with YRPW motif-like                                          |
| 1429209_at   | 1.4114347 | Up | Col23a1        | collagen, type XXIII, alpha 1                                                                 |
| 1460028_at   | 1.4109973 | Up | Grip2          | glutamate receptor interacting protein 2                                                      |
| 1458397_at   | 1.4088435 | Up | 622208         | predicted gene, 622208                                                                        |
| 1456874_at   | 1.4083447 | Up | Flrt2          | fibronectin leucine rich transmembrane protein 2                                              |
| 1452480_at   | 1.4080709 | Up | 4930529M08Rik  | RIKEN cDNA 4930529M08 gene                                                                    |
| 1421129_a_at | 1.4075565 | Up | Atp2a3         | ATPase, Ca <sup>++</sup> transporting, ubiquitous                                             |
| 1443906_at   | 1.4073391 | Up | Cd55           | CD55 antigen                                                                                  |
| 1447873_x_at | 1.4065794 | Up | Bid            | BH3 interacting domain death agonist                                                          |
| 1436304_at   | 1.4064412 | Up | C030003D03Rik  | RIKEN cDNA C030003D03 gene                                                                    |
| 1457345_at   | 1.4060882 | Up |                |                                                                                               |
| 1423753_at   | 1.4054184 | Up | Bambi          | BMP and activin membrane-bound inhibitor, homolog ( <i>Xenopus laevis</i> )                   |
| 1447819_x_at | 1.4048563 | Up | Col8a1         | collagen, type VIII, alpha 1                                                                  |
| 1422465_a_at | 1.4040818 | Up | Nxn            | nucleoredoxin                                                                                 |
| 1444232_at   | 1.4037651 | Up | Prkg1          | protein kinase, cGMP-dependent, type I                                                        |
| 1426174_s_at | 1.4036258 | Up | Igh-3 /// Ighg | immunoglobulin heavy chain 3 (serum IgG2b) /// Immunoglobulin heavy chain (gamma polypeptide) |
| 1435850_at   | 1.4032999 | Up | Xkr4           | MKIAA1889 protein                                                                             |

|              |           |    |                    |                                                              |
|--------------|-----------|----|--------------------|--------------------------------------------------------------|
| 1442272_at   | 1.4029396 | Up |                    |                                                              |
| 1456700_x_at | 1.4026469 | Up | Marcks             | myristoylated alanine rich protein kinase C substrate        |
| 1419109_at   | 1.402431  | Up | Hrc                | histidine rich calcium binding protein                       |
| 1458332_x_at | 1.4014657 | Up | Sox4               | SRY-box containing gene 4                                    |
| 1456387_at   | 1.3999523 | Up | Nol4               | nucleolar protein 4                                          |
| 1451935_a_at | 1.3991067 | Up | Spint2             | serine protease inhibitor, Kunitz type 2                     |
| 1429269_at   | 1.3988593 | Up | BC068157           | cDNA sequence BC068157                                       |
| 1417272_at   | 1.3986429 | Up | Fam114a1           | family with sequence similarity 114, member A1               |
| 1425176_at   | 1.3984948 | Up | C1ql3              | C1q-like 3                                                   |
| 1438981_at   | 1.398392  | Up |                    |                                                              |
| 1456883_at   | 1.3981694 | Up | Stox1              | storkhead box 1                                              |
| 1443560_at   | 1.3978887 | Up | ENSMUSG00000078444 | predicted gene, ENSMUSG00000078444                           |
| 1425697_at   | 1.3973627 | Up | Sdccag1            | serologically defined colon cancer antigen 1                 |
| 1418507_s_at | 1.3969234 | Up | Socs2              | suppressor of cytokine signaling 2                           |
| 1453510_s_at | 1.396915  | Up | Fam184a            | family with sequence similarity 184, member A                |
| 1455200_at   | 1.3967186 | Up | Pak6               | p21 (CDKN1A)-activated kinase 6                              |
| 1425876_a_at | 1.3958808 | Up | Glce               | glucuronyl C5-epimerase                                      |
| 1443007_at   | 1.3956964 | Up |                    |                                                              |
| 1428585_at   | 1.395267  | Up | Actn1              | actinin, alpha 1                                             |
| 1417559_at   | 1.3947008 | Up | Sfxn1              | sideroflexin 1                                               |
| 1445524_at   | 1.3946935 | Up |                    |                                                              |
| 1417376_a_at | 1.3944135 | Up | Cadm1              | cell adhesion molecule 1                                     |
| 1459564_at   | 1.3942895 | Up | 1E+08              | predicted gene, 100043819                                    |
| 1431236_at   | 1.3925279 | Up | Stk32b             | serine/threonine kinase 32B                                  |
| 1430520_at   | 1.3921043 | Up | Cpne8              | copine VIII                                                  |
| 1433950_at   | 1.3920764 | Up | Igsf21             | immunoglobulin superfamily, member 21                        |
| 1456261_at   | 1.3917334 | Up | Sh3kbp1            | SH3-domain kinase binding protein 1                          |
| 1421556_at   | 1.3913864 | Up | Serpina3a          | serine (or cysteine) peptidase inhibitor, clade A, member 3A |
| 1429725_at   | 1.3913757 | Up | Zfx3               | zinc finger homeobox 3                                       |
| 1459439_at   | 1.3904827 | Up | Mrps5              | mitochondrial ribosomal protein S5                           |
| 1449290_at   | 1.3901896 | Up | Dpysl5             | dihydropyrimidinase-like 5                                   |
| 1446754_a_at | 1.3894461 | Up | Vax2os1            | Vax2 opposite strand transcript 1                            |
| 1437371_at   | 1.3878278 | Up | Fam160a1           | family with sequence similarity 160, member A1               |
| 1434170_at   | 1.3868997 | Up | Wdr40b             | WD repeat domain 40B                                         |
| 1418509_at   | 1.3866204 | Up | Cbr2               | carbonyl reductase 2                                         |
| 1453446_at   | 1.3848702 | Up | 6430411K18Rik      | RIKEN cDNA 6430411K18 gene                                   |
| 1460244_at   | 1.3846155 | Up | Upb1               | ureidopropionase, beta                                       |
| 1417001_a_at | 1.384605  | Up | D4Wsu53e           | DNA segment, Chr 4, Wayne State University 53, expressed     |

|              |           |    |                                |                                                                                                         |
|--------------|-----------|----|--------------------------------|---------------------------------------------------------------------------------------------------------|
| 1424245_at   | 1.3845197 | Up | Ces2 ///<br>ENSMUSG00000031884 | carboxylesterase 2 /// predicted gene,<br>ENSMUSG00000031884                                            |
| 1435409_at   | 1.3843749 | Up |                                |                                                                                                         |
| 1437393_at   | 1.3840691 | Up | Prkca                          | protein kinase C, alpha                                                                                 |
| 1437197_at   | 1.3838333 | Up | Sorbs2                         | sorbin and SH3 domain containing 2                                                                      |
| 1418770_at   | 1.3837955 | Up | Cd2                            | CD2 antigen                                                                                             |
| 1449239_at   | 1.3830386 | Up | 1700045I19Rik                  | RIKEN cDNA 1700045I19 gene                                                                              |
| 1415971_at   | 1.3828074 | Up | Marcks                         | myristoylated alanine rich protein kinase C<br>substrate                                                |
| 1454741_s_at | 1.382287  | Up | Tmem164                        | transmembrane protein 164                                                                               |
| 1455447_at   | 1.3817693 | Up | D430019H16Rik                  | RIKEN cDNA D430019H16 gene                                                                              |
| 1460292_a_at | 1.3816053 | Up | Smarca1                        | SWI/SNF related, matrix associated, actin<br>dependent regulator of chromatin,<br>subfamily a, member 1 |
| 1421261_at   | 1.3816034 | Up | Lipg                           | lipase, endothelial                                                                                     |
| 1454995_at   | 1.3807461 | Up |                                |                                                                                                         |
| 1427280_at   | 1.3806566 | Up | Scn2a1                         | sodium channel, voltage-gated, type II,<br>alpha 1                                                      |
| 1453444_at   | 1.3800524 | Up | 5730437C12Rik                  | RIKEN cDNA 5730437C12 gene                                                                              |
| 1433154_at   | 1.3797706 | Up | B230204H03Rik                  | RIKEN cDNA B230204H03 gene                                                                              |
| 1417560_at   | 1.3797407 | Up | Sfxn1                          | sideroflexin 1                                                                                          |
| 1423730_at   | 1.3789948 | Up | Clptm1l                        | CLPTM1-like                                                                                             |
| 1420981_a_at | 1.3786819 | Up | Lmo4                           | LIM domain only 4                                                                                       |
| 1418451_at   | 1.3783891 | Up | Gng2                           | guanine nucleotide binding protein (G<br>protein), gamma 2                                              |
| 1455096_at   | 1.377683  | Up | Flrt2                          | fibronectin leucine rich transmembrane<br>protein 2                                                     |
| 1444495_at   | 1.3775945 | Up |                                |                                                                                                         |
| 1447527_at   | 1.3773663 | Up |                                |                                                                                                         |
| 1454136_a_at | 1.3772463 | Up | 4921524J17Rik                  | RIKEN cDNA 4921524J17 gene                                                                              |
| 1426124_a_at | 1.3771917 | Up | Clk1                           | CDC-like kinase 1                                                                                       |
| 1434494_at   | 1.3763491 | Up | Zar1                           | zygote arrest 1                                                                                         |
| 1431080_at   | 1.3756305 | Up | Galnt16                        | UDP-N-acetyl-alpha-D-<br>galactosamine:polypeptide N-<br>acetylglactosaminyltransferase-like 6          |
| 1434275_at   | 1.3755267 | Up | Nkd2                           | naked cuticle 2 homolog (Drosophila)                                                                    |
| 1426471_at   | 1.3751547 | Up | Zfp52                          | zinc finger protein 52                                                                                  |
| 1415973_at   | 1.3742394 | Up | Marcks                         | myristoylated alanine rich protein kinase C<br>substrate                                                |
| 1443817_x_at | 1.3737491 | Up | Nkx2-6                         | NK2 transcription factor related, locus 6<br>(Drosophila)                                               |
| 1456127_at   | 1.3731071 | Up | Cnpy1                          | canopy 1 homolog (zebrafish)                                                                            |
| 1453192_at   | 1.372555  | Up | Fam101a                        | family with sequence similarity 101,<br>member A                                                        |
| 1436410_at   | 1.3718975 | Up | Gm941                          | gene model 941, (NCBI)                                                                                  |
| 1449109_at   | 1.3713565 | Up | Socs2                          | suppressor of cytokine signaling 2                                                                      |
| 1443578_at   | 1.3711306 | Up |                                |                                                                                                         |

|              |           |    |                                          |                                                                                                                                                     |
|--------------|-----------|----|------------------------------------------|-----------------------------------------------------------------------------------------------------------------------------------------------------|
| 1447325_at   | 1.3706259 | Up |                                          |                                                                                                                                                     |
| 1447640_s_at | 1.370247  | Up | Pbx3                                     | pre B-cell leukemia transcription factor 3                                                                                                          |
| 1421812_at   | 1.369959  | Up | Tapbp                                    | TAP binding protein                                                                                                                                 |
| 1428764_at   | 1.3693413 | Up | Meg3                                     | maternally expressed 3                                                                                                                              |
| 1454862_at   | 1.3689189 | Up | Phldb2                                   | pleckstrin homology-like domain, family B, member 2                                                                                                 |
| 1423186_at   | 1.3684255 | Up | Tiam2                                    | T-cell lymphoma invasion and metastasis 2                                                                                                           |
| 1418615_at   | 1.3681707 | Up | Astn1                                    | astrotactin 1                                                                                                                                       |
| 1418091_at   | 1.3667921 | Up | Tcfcp2l1                                 | transcription factor CP2-like 1                                                                                                                     |
| 1419002_s_at | 1.366707  | Up | Baat                                     | bile acid-Coenzyme A: amino acid N-acyltransferase                                                                                                  |
| 1440642_at   | 1.3666874 | Up | D630042P16Rik                            | RIKEN cDNA D630042P16 gene                                                                                                                          |
| 1456210_at   | 1.3662177 | Up | 5430407P10Rik                            | RIKEN cDNA 5430407P10 gene                                                                                                                          |
| 1434450_s_at | 1.3659079 | Up | Adrbk2                                   | adrenergic receptor kinase, beta 2                                                                                                                  |
| 1453304_s_at | 1.3653591 | Up | Ly6e                                     | lymphocyte antigen 6 complex, locus E                                                                                                               |
| 1448656_at   | 1.3651067 | Up | Cacnb3                                   | calcium channel, voltage-dependent, beta 3 subunit                                                                                                  |
| 1449604_at   | 1.364345  | Up | 665717 /// 677788 /// Acp1 /// LOC631286 | predicted gene, 665717 /// predicted gene, 677788 /// acid phosphatase 1, soluble /// similar to acid phosphatase 1, soluble                        |
| 1442063_at   | 1.3640869 | Up | Adamts1                                  | ADAMTS-like 1                                                                                                                                       |
| 1423489_at   | 1.3635477 | Up | LOC100047565 /// Mmd                     | similar to monocyte to macrophage differentiation-associated /// monocyte to macrophage differentiation-associated                                  |
| 1452179_at   | 1.3634021 | Up | Phf17                                    | PHD finger protein 17                                                                                                                               |
| 1434364_at   | 1.3630025 | Up | Map3k14                                  | mitogen-activated protein kinase kinase kinase 14                                                                                                   |
| 1453701_at   | 1.3629915 | Up | 4921515E04Rik                            | RIKEN cDNA 4921515E04 gene                                                                                                                          |
| 1434262_at   | 1.3627357 | Up |                                          |                                                                                                                                                     |
| 1453809_at   | 1.3622651 | Up | Lypd5                                    | Ly6/Plaur domain containing 5                                                                                                                       |
| 1423635_at   | 1.3619847 | Up | Bmp2                                     | bone morphogenetic protein 2                                                                                                                        |
| 1437332_at   | 1.3619019 | Up |                                          |                                                                                                                                                     |
| 1437168_at   | 1.3618839 | Up | RP23-12124.6                             | serine-arginine repressor protein                                                                                                                   |
| 1429983_at   | 1.3618526 | Up | 2010002M09Rik                            | RIKEN cDNA 2010002M09 gene                                                                                                                          |
| 1426064_at   | 1.3608264 | Up | Cyp3a44                                  | cytochrome P450, family 3, subfamily a, polypeptide 44                                                                                              |
| 1448338_at   | 1.3608116 | Up | Pgcp                                     | plasma glutamate carboxypeptidase                                                                                                                   |
| 1437702_at   | 1.3603585 | Up | Tgm6                                     | transglutaminase 6                                                                                                                                  |
| 1437754_at   | 1.3603101 | Up | AW146299                                 | expressed sequence AW146299                                                                                                                         |
| 1448861_at   | 1.360119  | Up | Traf5                                    | Tnf receptor-associated factor 5                                                                                                                    |
| 1449471_at   | 1.3600719 | Up | Kcnmb4 /// LOC100047870                  | potassium large conductance calcium-activated channel, subfamily M, beta member 4 /// similar to calcium activated potassium channel beta 4 subunit |

|              |           |      |                  |                                                                                       |
|--------------|-----------|------|------------------|---------------------------------------------------------------------------------------|
| 1450610_at   | 16.173891 | Down | Ucn              | urocortin                                                                             |
| 1423606_at   | 9.21812   | Down | Postn            | periostin, osteoblast specific factor                                                 |
| 1422825_at   | 8.876153  | Down | Cartpt           | CART prepropeptide                                                                    |
| 1447592_at   | 8.297856  | Down | Dbh              | dopamine beta hydroxylase                                                             |
| 1427789_s_at | 6.3654084 | Down | Gnas             | GNAS (guanine nucleotide binding protein, alpha stimulating) complex locus            |
| 1442315_at   | 5.5174475 | Down | Foxd2            | forkhead box D2                                                                       |
| 1446634_at   | 4.8349915 | Down | D830036C21Rik    | RIKEN cDNA D830036C21 gene                                                            |
| 1451440_at   | 4.5607104 | Down | Chodl            | chondrolectin                                                                         |
| 1445237_at   | 4.0598435 | Down |                  |                                                                                       |
| 1449253_at   | 3.9332232 | Down | Smc1b            | structural maintenance of chromosomes 1B                                              |
| 1440672_at   | 3.4024205 | Down | Zfp541           | zinc finger protein 541                                                               |
| 1419681_a_at | 2.8521724 | Down | Prok2            | prokineticin 2                                                                        |
| 1444189_at   | 2.7473714 | Down |                  |                                                                                       |
| 1449967_at   | 2.7309074 | Down | Sim1             | single-minded homolog 1 (Drosophila) family with sequence similarity 159, member B    |
| 1430977_at   | 2.543762  | Down | Fam159b          |                                                                                       |
| 1425957_x_at | 2.4961114 | Down | 1700021K02Rik    | RIKEN cDNA 1700021K02 gene                                                            |
| 1454660_at   | 2.448857  | Down | 1100001E04Rik    | RIKEN cDNA 1100001E04 gene                                                            |
| 1429742_at   | 2.3721392 | Down | Rcbtb2           | regulator of chromosome condensation (RCC1) and BTB (POZ) domain containing protein 2 |
| 1439037_at   | 2.3576212 | Down | Ddx17            | DEAD (Asp-Glu-Ala-Asp) box polypeptide 17                                             |
| 1437769_at   | 2.0290477 | Down |                  |                                                                                       |
| 1423856_at   | 1.9905156 | Down | Popdc3           | popeye domain containing 3                                                            |
| 1420921_at   | 1.9830313 | Down | Cd151            | CD151 antigen                                                                         |
| 1420098_s_at | 1.981642  | Down | D13ErtD787e      | DNA segment, Chr 13, ERATO Doi 787, expressed                                         |
| 1449133_at   | 1.9649194 | Down | Spr1a            | small proline-rich protein 1A                                                         |
| 1453807_at   | 1.9621962 | Down | 6330563C09Rik    | RIKEN cDNA 6330563C09 gene                                                            |
| 1439974_at   | 1.9326849 | Down | Cdc26 /// Fkbp15 | cell division cycle 26 /// FK506 binding protein 15                                   |
| 1422644_at   | 1.9157398 | Down | Sh3bgr           | SH3-binding domain glutamic acid-rich protein                                         |
| 1457048_at   | 1.891068  | Down | Qrfpr            | pyroglutamylated RFamide peptide receptor                                             |
| 1436449_at   | 1.8891056 | Down |                  |                                                                                       |
| 1441401_at   | 1.8582479 | Down | C79329           | expressed sequence C79329                                                             |
| 1443202_at   | 1.852861  | Down |                  |                                                                                       |
| 1422860_at   | 1.8139789 | Down | Nts              | neurotensin                                                                           |
| 1447051_at   | 1.812841  | Down | Rnf43            | Ring finger protein 43, mRNA (cDNA clone IMAGE:5025887)                               |
| 1434877_at   | 1.8095164 | Down | Nptx1            | neuronal pentraxin 1                                                                  |
| 1438148_at   | 1.7986373 | Down | Cxcl3            | chemokine (C-X-C motif) ligand 3                                                      |

|              |           |      |                                                    |                                                                                                |
|--------------|-----------|------|----------------------------------------------------|------------------------------------------------------------------------------------------------|
| 1450268_at   | 1.7680202 | Down | Fign                                               | fidgetin                                                                                       |
| 1456049_at   | 1.7551692 | Down | Rala                                               | v-ral simian leukemia viral oncogene homolog A (ras related)                                   |
| 1417802_at   | 1.7407538 | Down | 1110032A04Rik                                      | RIKEN cDNA 1110032A04 gene                                                                     |
| 1460111_at   | 1.7186016 | Down | Myt1l                                              | myelin transcription factor 1-like                                                             |
| 1432741_at   | 1.7180464 | Down | 9530071P10Rik                                      | RIKEN cDNA 9530071P10 gene                                                                     |
| 1438112_at   | 1.7168565 | Down | 9430021M05Rik                                      | RIKEN cDNA 9430021M05 gene                                                                     |
| 1459570_at   | 1.7112045 | Down |                                                    |                                                                                                |
| 1417156_at   | 1.7111756 | Down | Krt19                                              | keratin 19                                                                                     |
| 1418983_at   | 1.7082597 | Down | Inadl                                              | InaD-like (Drosophila)                                                                         |
| 1442873_at   | 1.691454  | Down |                                                    |                                                                                                |
| 1443746_x_at | 1.6843995 | Down | Dmp1                                               | dentin matrix protein 1                                                                        |
| 1443745_s_at | 1.6790313 | Down | Dmp1                                               | dentin matrix protein 1                                                                        |
| 1439936_at   | 1.6679906 | Down | BE949265                                           | cDNA sequence BE949265                                                                         |
| 1431700_at   | 1.6668944 | Down | Grin2b                                             | glutamate receptor, ionotropic, NMDA2B (epsilon 2)                                             |
| 1450252_at   | 1.6517788 | Down | Onecut1                                            | one cut domain, family member 1                                                                |
| 1420090_at   | 1.6505996 | Down |                                                    |                                                                                                |
| 1418203_at   | 1.6488825 | Down | Pmaip1                                             | phorbol-12-myristate-13-acetate-induced protein 1                                              |
| 1460124_at   | 1.6480864 | Down | Nccrp1                                             | non-specific cytotoxic cell receptor protein 1 homolog (zebrafish)                             |
| 1459168_at   | 1.6429302 | Down |                                                    |                                                                                                |
| 1420418_at   | 1.6384014 | Down | Syt2                                               | synaptotagmin II                                                                               |
| 1439703_at   | 1.634911  | Down | Cd200r1                                            | CD200 receptor 1                                                                               |
| 1459837_at   | 1.6324334 | Down |                                                    |                                                                                                |
| 1421740_at   | 1.6293948 | Down | Gnas                                               | GNAS (guanine nucleotide binding protein, alpha stimulating) complex locus                     |
| 1431757_s_at | 1.6259425 | Down | 100040511 ///<br>5033417F24Rik ///<br>LOC100045477 | predicted gene, 100040511 /// RIKEN cDNA 5033417F24 gene /// hypothetical protein LOC100045477 |
| 1442973_at   | 1.6198915 | Down | C80865                                             | expressed sequence C80865                                                                      |
| 1423874_at   | 1.615682  | Down | Wdr33                                              | WD repeat domain 33                                                                            |
| 1438217_at   | 1.608605  | Down | A2bp1                                              | ataxin 2 binding protein 1                                                                     |
| 1443540_at   | 1.6064776 | Down | Map3k1                                             | mitogen-activated protein kinase kinase kinase 1                                               |
| 1443256_at   | 1.6046002 | Down |                                                    |                                                                                                |
| 1456495_s_at | 1.6008676 | Down | Osbpl6                                             | oxysterol binding protein-like 6                                                               |
| 1450193_at   | 1.5999472 | Down | Hcn1                                               | hyperpolarization-activated, cyclic nucleotide-gated K+ 1                                      |
| 1420751_at   | 1.5879183 | Down | ENSMUSG00000068074                                 | predicted gene, ENSMUSG00000068074                                                             |
| 1427038_at   | 1.5863004 | Down | Penk1                                              | preproenkephalin 1                                                                             |
| 1438661_a_at | 1.5853121 | Down | Arf2                                               | ADP-ribosylation factor 2                                                                      |
| 1421368_at   | 1.5849022 | Down | Scrt1                                              | scratch homolog 1, zinc finger protein (Drosophila)                                            |



|              |           |      |                      |                                                                                                                                                              |
|--------------|-----------|------|----------------------|--------------------------------------------------------------------------------------------------------------------------------------------------------------|
| 1442576_at   | 1.5834031 | Down | Creb5                | cAMP responsive element binding protein 5                                                                                                                    |
| 1420063_at   | 1.5758913 | Down |                      |                                                                                                                                                              |
| 1456764_at   | 1.5757145 | Down | Slc35f3              | solute carrier family 35, member F3                                                                                                                          |
| 1441027_at   | 1.573377  | Down |                      |                                                                                                                                                              |
| 1424939_at   | 1.5732677 | Down | Asz1                 | ankyrin repeat, SAM and basic leucine zipper domain containing 1                                                                                             |
| 1441985_at   | 1.5692582 | Down | 4933416C03Rik        | RIKEN cDNA 4933416C03 gene                                                                                                                                   |
| 1459709_at   | 1.5605116 | Down |                      |                                                                                                                                                              |
| 1420887_a_at | 1.5592368 | Down | Bcl211               | BCL2-like 1                                                                                                                                                  |
| 1425829_a_at | 1.5556602 | Down | Steap4               | STEAP family member 4                                                                                                                                        |
| 1441693_at   | 1.5529088 | Down | Adams3               | a disintegrin-like and metallopeptidase (reprolysin type) with thrombospondin type 1 motif, 3                                                                |
| 1454102_at   | 1.5474818 | Down | 5031425E22Rik        | RIKEN cDNA 5031425E22 gene                                                                                                                                   |
| 1442994_at   | 1.5402776 | Down |                      |                                                                                                                                                              |
| 1441276_at   | 1.529882  | Down | Ptprk                | protein tyrosine phosphatase, receptor type, K                                                                                                               |
| 1426938_at   | 1.5235516 | Down | Nova1                | neuro-oncological ventral antigen 1                                                                                                                          |
| 1457192_at   | 1.5235362 | Down |                      |                                                                                                                                                              |
| 1438364_x_at | 1.5227835 | Down | Ang4                 | angiogenin, ribonuclease A family, member 4                                                                                                                  |
| 1458008_at   | 1.5222739 | Down |                      |                                                                                                                                                              |
| 1453043_at   | 1.5212953 | Down | 0610012H03Rik        | RIKEN cDNA 0610012H03 gene                                                                                                                                   |
| 1453445_at   | 1.5162067 | Down | 9030601B04Rik        | RIKEN cDNA 9030601B04 gene                                                                                                                                   |
| 1448393_at   | 1.5123023 | Down | Cldn7                | claudin 7                                                                                                                                                    |
| 1419698_at   | 1.5118649 | Down | Cxcl11 /// LOC630447 | chemokine (C-X-C motif) ligand 11 /// similar to Small inducible cytokine B11 precursor (CXCL11) (Interferon-inducible T-cell alpha chemoattractant) (I-TAC) |
| 1431202_at   | 1.5091759 | Down | Herc3                | hect domain and RLD 3                                                                                                                                        |
| 1456065_at   | 1.5078704 | Down | Ubash3a              | ubiquitin associated and SH3 domain containing, A                                                                                                            |
| 1422927_at   | 1.5067229 | Down | Yipf7                | Yip1 domain family, member 7                                                                                                                                 |
| 1425444_a_at | 1.5020697 | Down | Tgfbr2               | transforming growth factor, beta receptor II                                                                                                                 |
| 1449031_at   | 1.5005687 | Down | Cited1               | Cbp/p300-interacting transactivator with Glu/Asp-rich carboxy-terminal domain 1                                                                              |
| 1422700_at   | 1.4974418 | Down | Alox12               | arachidonate 12-lipoxygenase                                                                                                                                 |
| 1435482_at   | 1.4965173 | Down | Fibcd1               | fibrinogen C domain containing 1                                                                                                                             |
| 1431361_at   | 1.4953748 | Down | Prcp                 | prolylcarboxypeptidase (angiotensinase C)                                                                                                                    |
| 1425267_a_at | 1.4951977 | Down | Pear1                | platelet endothelial aggregation receptor 1                                                                                                                  |
| 1438628_x_at | 1.494821  | Down | Cntn3                | contactin 3                                                                                                                                                  |
| 1417489_at   | 1.4923755 | Down | Npy2r                | neuropeptide Y receptor Y2                                                                                                                                   |
| 1453298_at   | 1.4918015 | Down | Ptpn21               | protein tyrosine phosphatase, non-                                                                                                                           |

|              |           |      |                                                                                             |                                                                                                                                                                                                                 |
|--------------|-----------|------|---------------------------------------------------------------------------------------------|-----------------------------------------------------------------------------------------------------------------------------------------------------------------------------------------------------------------|
|              |           |      |                                                                                             | receptor type 21                                                                                                                                                                                                |
| 1422136_at   | 1.4889983 | Down | LOC677213 /// Uhmk1                                                                         | similar to U2AF homology motif (UHM) kinase 1 /// U2AF homology motif (UHM) kinase 1                                                                                                                            |
| 1449565_at   | 1.4873782 | Down | Cyp2g1                                                                                      | cytochrome P450, family 2, subfamily g, polypeptide 1                                                                                                                                                           |
| 1419003_at   | 1.4869812 | Down | Bves                                                                                        | blood vessel epicardial substance                                                                                                                                                                               |
| 1416905_at   | 1.4823568 | Down | Guca2a                                                                                      | guanylate cyclase activator 2a (guanylin)                                                                                                                                                                       |
| 1419539_at   | 1.4808258 | Down | Irx4                                                                                        | Iroquois related homeobox 4 (Drosophila)                                                                                                                                                                        |
| 1418845_at   | 1.4795423 | Down | Proc                                                                                        | protein C                                                                                                                                                                                                       |
| 1454473_at   | 1.4785581 | Down | 4933433M23Rik                                                                               | RIKEN cDNA 4933433M23 gene                                                                                                                                                                                      |
| 1431206_at   | 1.4777828 | Down | 5730601F06Rik                                                                               | RIKEN cDNA 5730601F06 gene                                                                                                                                                                                      |
| 1454529_at   | 1.4768867 | Down |                                                                                             |                                                                                                                                                                                                                 |
| 1459422_at   | 1.4762946 | Down |                                                                                             |                                                                                                                                                                                                                 |
| 1431369_at   | 1.4760915 | Down | Ddef2                                                                                       | development and differentiation enhancing factor 2                                                                                                                                                              |
| 1441395_at   | 1.4755491 | Down | AU021933                                                                                    | expressed sequence AU021933                                                                                                                                                                                     |
| 1440942_at   | 1.4738885 | Down | Dact2                                                                                       | dapper homolog 2, antagonist of beta-catenin (xenopus)                                                                                                                                                          |
| 1422225_s_at | 1.4705684 | Down | ENSMUSG00000052469<br>/// Gpr31c ///<br>LOC100048768 ///<br>Tcp10a /// Tcp10b ///<br>Tcp10c | predicted gene,<br>ENSMUSG00000052469 /// G protein-coupled receptor 31, D17Leh66c region<br>/// similar to t-complex protein 10c /// t-complex protein 10a /// t-complex protein 10b /// t-complex protein 10c |
| 1439842_at   | 1.4672835 | Down | Zfp287                                                                                      | Zinc finger protein 287, mRNA (cDNA clone IMAGE:5352159)                                                                                                                                                        |
| 1448845_at   | 1.4669638 | Down | Rpp25                                                                                       | ribonuclease P 25 subunit (human)                                                                                                                                                                               |
| 1436475_at   | 1.4651537 | Down | Nr2f2                                                                                       | nuclear receptor subfamily 2, group F, member 2                                                                                                                                                                 |
| 1421404_at   | 1.4635819 | Down | Cxcl15                                                                                      | chemokine (C-X-C motif) ligand 15                                                                                                                                                                               |
| 1457052_at   | 1.4602299 | Down | Kcng1                                                                                       | potassium voltage-gated channel, subfamily G, member 1                                                                                                                                                          |
| 1433846_s_at | 1.4588301 | Down | Fam175b                                                                                     | family with sequence similarity 175, member B                                                                                                                                                                   |
| 1418659_at   | 1.4575241 | Down | Clock                                                                                       | Circadian locomotor output cycles kaput                                                                                                                                                                         |
| 1454592_at   | 1.4562539 | Down | 9430012M22Rik                                                                               | RIKEN cDNA 9430012M22 gene                                                                                                                                                                                      |
| 1441047_at   | 1.4538276 | Down | Slc45a4                                                                                     | solute carrier family 45, member 4                                                                                                                                                                              |
| 1427744_at   | 1.4533246 | Down | Ccnb3                                                                                       | cyclin B3                                                                                                                                                                                                       |
| 1447236_at   | 1.4508848 | Down | Kif21a                                                                                      | kinesin family member 21A                                                                                                                                                                                       |
| 1436440_at   | 1.4503018 | Down | Slc25a12                                                                                    | solute carrier family 25 (mitochondrial carrier, Aralar), member 12                                                                                                                                             |
| 1434026_at   | 1.4465281 | Down | Atp8b2                                                                                      | ATPase, class I, type 8B, member 2                                                                                                                                                                              |
| 1436274_at   | 1.446226  | Down | Mrap2                                                                                       | melanocortin 2 receptor accessory protein 2                                                                                                                                                                     |
| 1441211_at   | 1-Jan     | Down |                                                                                             |                                                                                                                                                                                                                 |

|              |           |      |               |                                                                            |
|--------------|-----------|------|---------------|----------------------------------------------------------------------------|
| 1456074_at   | 1.4449158 | Down | Sdr9c7        | 4short chain dehydrogenase/reductase family 9C, member 7                   |
| 1428771_at   | 1.4443241 | Down | Klhdc10       | kelch domain containing 10                                                 |
| 1455358_at   | 1.444206  | Down | A2bp1         | Hexaribonucleotide binding protein 1 (Hrnbp1)                              |
| 1442898_at   | 1.4439242 | Down |               |                                                                            |
| 1433659_at   | 1.4427999 | Down | Tubgcp4       | tubulin, gamma complex associated protein 4                                |
| 1421572_at   | 1.4407928 | Down | Hif3a         | hypoxia inducible factor 3, alpha subunit                                  |
| 1456283_at   | 1.4403324 | Down | Neto1         | neuropilin (NRP) and tolloid (TLL)-like 1                                  |
| 1447152_at   | 1.439853  | Down |               |                                                                            |
| 1424187_at   | 1.438569  | Down | Ccdc80        | coiled-coil domain containing 80                                           |
| 1439818_at   | 1.4383178 | Down | AI931714      | expressed sequence AI931714                                                |
| 1453177_at   | 1.4376773 | Down | Snx31         | sorting nexin 31                                                           |
| 1442052_at   | 1.4375372 | Down |               |                                                                            |
| 1432814_at   | 1.4372432 | Down | 2900064F13Rik | RIKEN cDNA 2900064F13 gene                                                 |
| 1430477_s_at | 1.4351379 | Down |               |                                                                            |
| 1441530_at   | 1.4343128 | Down |               |                                                                            |
| 1426320_at   | 1.4331483 | Down | Snx29         | sorting nexin 29                                                           |
| 1438219_at   | 1.4280138 | Down | Pura          | Purine rich element binding protein A (Pura), mRNA                         |
| 1443855_at   | 1.4265387 | Down | Kcnc1         | potassium voltage gated channel, Shaw-related subfamily, member 1          |
| 1440046_at   | 1.424309  | Down | BC031748      | cDNA sequence BC031748                                                     |
| 1430636_at   | 1.4242462 | Down | Ppp4r1l       | protein phosphatase 4, regulatory subunit 1-like                           |
| 1459250_at   | 1.4234334 | Down | Tshz2         | teashirt zinc finger family member 2                                       |
| 1446573_at   | 1.4231948 | Down | Edil3         | Del1 minor splice variant (Del1)                                           |
| 1447289_at   | 1.4229891 | Down | AA763521      | expressed sequence AA763521                                                |
| 1449666_at   | 1.4228305 | Down | Atrnl1        | Attractin like 1, mRNA (cDNA clone IMAGE:5354506)                          |
| 1436168_at   | 1.4209912 | Down | C730029A08Rik | RIKEN cDNA C730029A08 gene                                                 |
| 1428776_at   | 1.4202423 | Down | Slc10a6       | solute carrier family 10 (sodium/bile acid cotransporter family), member 6 |
| 1439755_at   | 1.4201276 | Down | Sipa1l1       | signal-induced proliferation-associated 1 like 1                           |
| 1444914_at   | 1.4198054 | Down |               |                                                                            |
| 1432263_a_at | 1.4197311 | Down | Cox7a2l       | cytochrome c oxidase subunit VIIa polypeptide 2-like                       |
| 1441167_at   | 1.4187241 | Down |               |                                                                            |
| 1444553_at   | 1.4157374 | Down |               |                                                                            |
| 1456473_x_at | 1.4151565 | Down | Arf2          | ADP-ribosylation factor 2                                                  |
| 1458408_at   | 1.4113505 | Down | Samd8         | sterile alpha motif domain containing 8                                    |
| 1440192_at   | 1.411134  | Down | Ttc39b        | tetratricopeptide repeat domain 39B                                        |
| 1429273_at   | 1.4098935 | Down | Bmper         | BMP-binding endothelial regulator                                          |
| 1419065_at   | 1.4090718 | Down | Nepn          | nephrocan                                                                  |

|              |           |      |                     |                                                                                                               |
|--------------|-----------|------|---------------------|---------------------------------------------------------------------------------------------------------------|
| 1458565_at   | 1.4011527 | Down | Arl2                | ADP-ribosylation factor-like 2                                                                                |
| 1450947_at   | 1.4006761 | Down | 2610528J11Rik       | RIKEN cDNA 2610528J11 gene                                                                                    |
| 1433279_at   | 1.4006194 | Down | 5830440H09Rik       | RIKEN cDNA 5830440H09 gene                                                                                    |
| 1446191_at   | 1.40053   | Down | Abi3                | ABI gene family, member 3                                                                                     |
| 1440557_at   | 1.3982913 | Down | lpw                 | lpw mRNA, partial sequence                                                                                    |
| 1419399_at   | 1.3972638 | Down | Mttp                | microsomal triglyceride transfer protein                                                                      |
| 1425132_at   | 1.3970522 | Down | Neto1               | neuropilin (NRP) and tolloid (TLL)-like 1                                                                     |
| 1423015_at   | 1.3969625 | Down | Kirrel              | kin of IRRE like (Drosophila)                                                                                 |
| 1420713_a_at | 1.3969257 | Down | Mdfi                | MyoD family inhibitor                                                                                         |
| 1449369_at   | 1.3943688 | Down | Tmprss2             | transmembrane protease, serine 2                                                                              |
| 1450813_a_at | 1.3932084 | Down | Tnni1               | troponin I, skeletal, slow 1                                                                                  |
| 1417349_at   | 1.3919843 | Down | Pldn                | pallidin                                                                                                      |
| 1454574_at   | 1.3911515 | Down | C430049A07Rik       | RIKEN cDNA C430049A07 gene                                                                                    |
| 1427313_at   | 1.3900918 | Down | Ptgir               | prostaglandin I receptor (IP)                                                                                 |
| 1444150_at   | 1.3899661 | Down | Epb4.1              | erythrocyte protein band 4.1                                                                                  |
| 1447012_at   | 1.3891221 | Down |                     |                                                                                                               |
| 1441590_at   | 1.3877763 | Down | Kcnj5               | potassium inwardly-rectifying channel, subfamily J, member 5                                                  |
| 1443129_at   | 1.3871737 | Down |                     |                                                                                                               |
| 1454515_at   | 1.3860133 | Down | 5430425E15Rik       | RIKEN cDNA 5430425E15 gene                                                                                    |
| 1446247_at   | 1.3859707 | Down | Adamts18            | a disintegrin-like and metallopeptidase (reprolysin type) with thrombospondin type 1 motif, 18                |
| 1451793_at   | 1.3857527 | Down | Klhl24              | kelch-like 24 (Drosophila)                                                                                    |
| 1437989_at   | 1.3854432 | Down | Pde8b               | phosphodiesterase 8B                                                                                          |
| 1431838_at   | 1.3846707 | Down | 1700128E19Rik       | RIKEN cDNA 1700128E19 gene                                                                                    |
| 1439292_at   | 1.3841722 | Down |                     |                                                                                                               |
| 1431376_at   | 1.384003  | Down | Wdr62               | WD repeat domain 62                                                                                           |
| 1447419_at   | 1.3811703 | Down |                     |                                                                                                               |
| 1460299_at   | 1.3798462 | Down | Mnx1                | motor neuron and pancreas homeobox 1                                                                          |
| 1431678_at   | 1.3785907 | Down | 4930556N08Rik       | RIKEN cDNA 4930556N08 gene                                                                                    |
| 1419983_at   | 1.3783932 | Down | Zfp644              | zinc finger protein 644                                                                                       |
| 1453528_at   | 1.3776819 | Down | Lta4h               | leukotriene A4 hydrolase                                                                                      |
| 1418586_at   | 1.376154  | Down | Adcy9               | adenylate cyclase 9                                                                                           |
| 1442988_at   | 1.374853  | Down |                     |                                                                                                               |
| 1443484_at   | 1.374545  | Down | Rpap1               | RNA polymerase II associated protein 1                                                                        |
| 1441316_at   | 1.3736535 | Down | LOC677060 /// Wnt8b | similar to wingless related MMTV integration site 8b /// wingless related MMTV integration site 8b            |
| 1444355_at   | 1.3727648 | Down | Atp8a1              | ATPase, aminophospholipid transporter (APLT), class I, type 8A, member 1 (Atp8a1), transcript variant 2, mRNA |
| 1450489_at   | 1.3719501 | Down | Sall1               | sal-like 1 (Drosophila)                                                                                       |
| 1450184_s_at | 1.3700032 | Down | Tef                 | thyrotroph embryonic factor                                                                                   |

|              |           |      |          |                                                                    |
|--------------|-----------|------|----------|--------------------------------------------------------------------|
| 1446232_at   | 1.3688856 | Down |          |                                                                    |
| 1435548_at   | 1.3681084 | Down | Mrs2     | MRS2 magnesium homeostasis factor homolog ( <i>S. cerevisiae</i> ) |
| 1443365_at   | 1.3666875 | Down | Htr4     | 5 hydroxytryptamine (serotonin) receptor 4                         |
| 1421772_a_at | 1.3663312 | Down | Cox7a2l  | cytochrome c oxidase subunit VIIa polypeptide 2-like               |
| 1450256_at   | 1.364704  | Down | Cer1     | cerberus 1 homolog ( <i>Xenopus laevis</i> )                       |
| 1440957_at   | 1.3645707 | Down | Defb29   | defensin beta 29                                                   |
| 1447441_at   | 1.3642951 | Down | Arhgef17 | Rho guanine nucleotide exchange factor (GEF) 17                    |
| 1442471_at   | 1.3640573 | Down |          |                                                                    |
| 1446259_at   | 1.36287   | Down |          |                                                                    |
| 1440348_at   | 1.361499  | Down | Zfyve9   | zinc finger, FYVE domain containing 9                              |
| 1435031_at   | 1.3602613 | Down | Tmem120a | transmembrane protein 120A                                         |

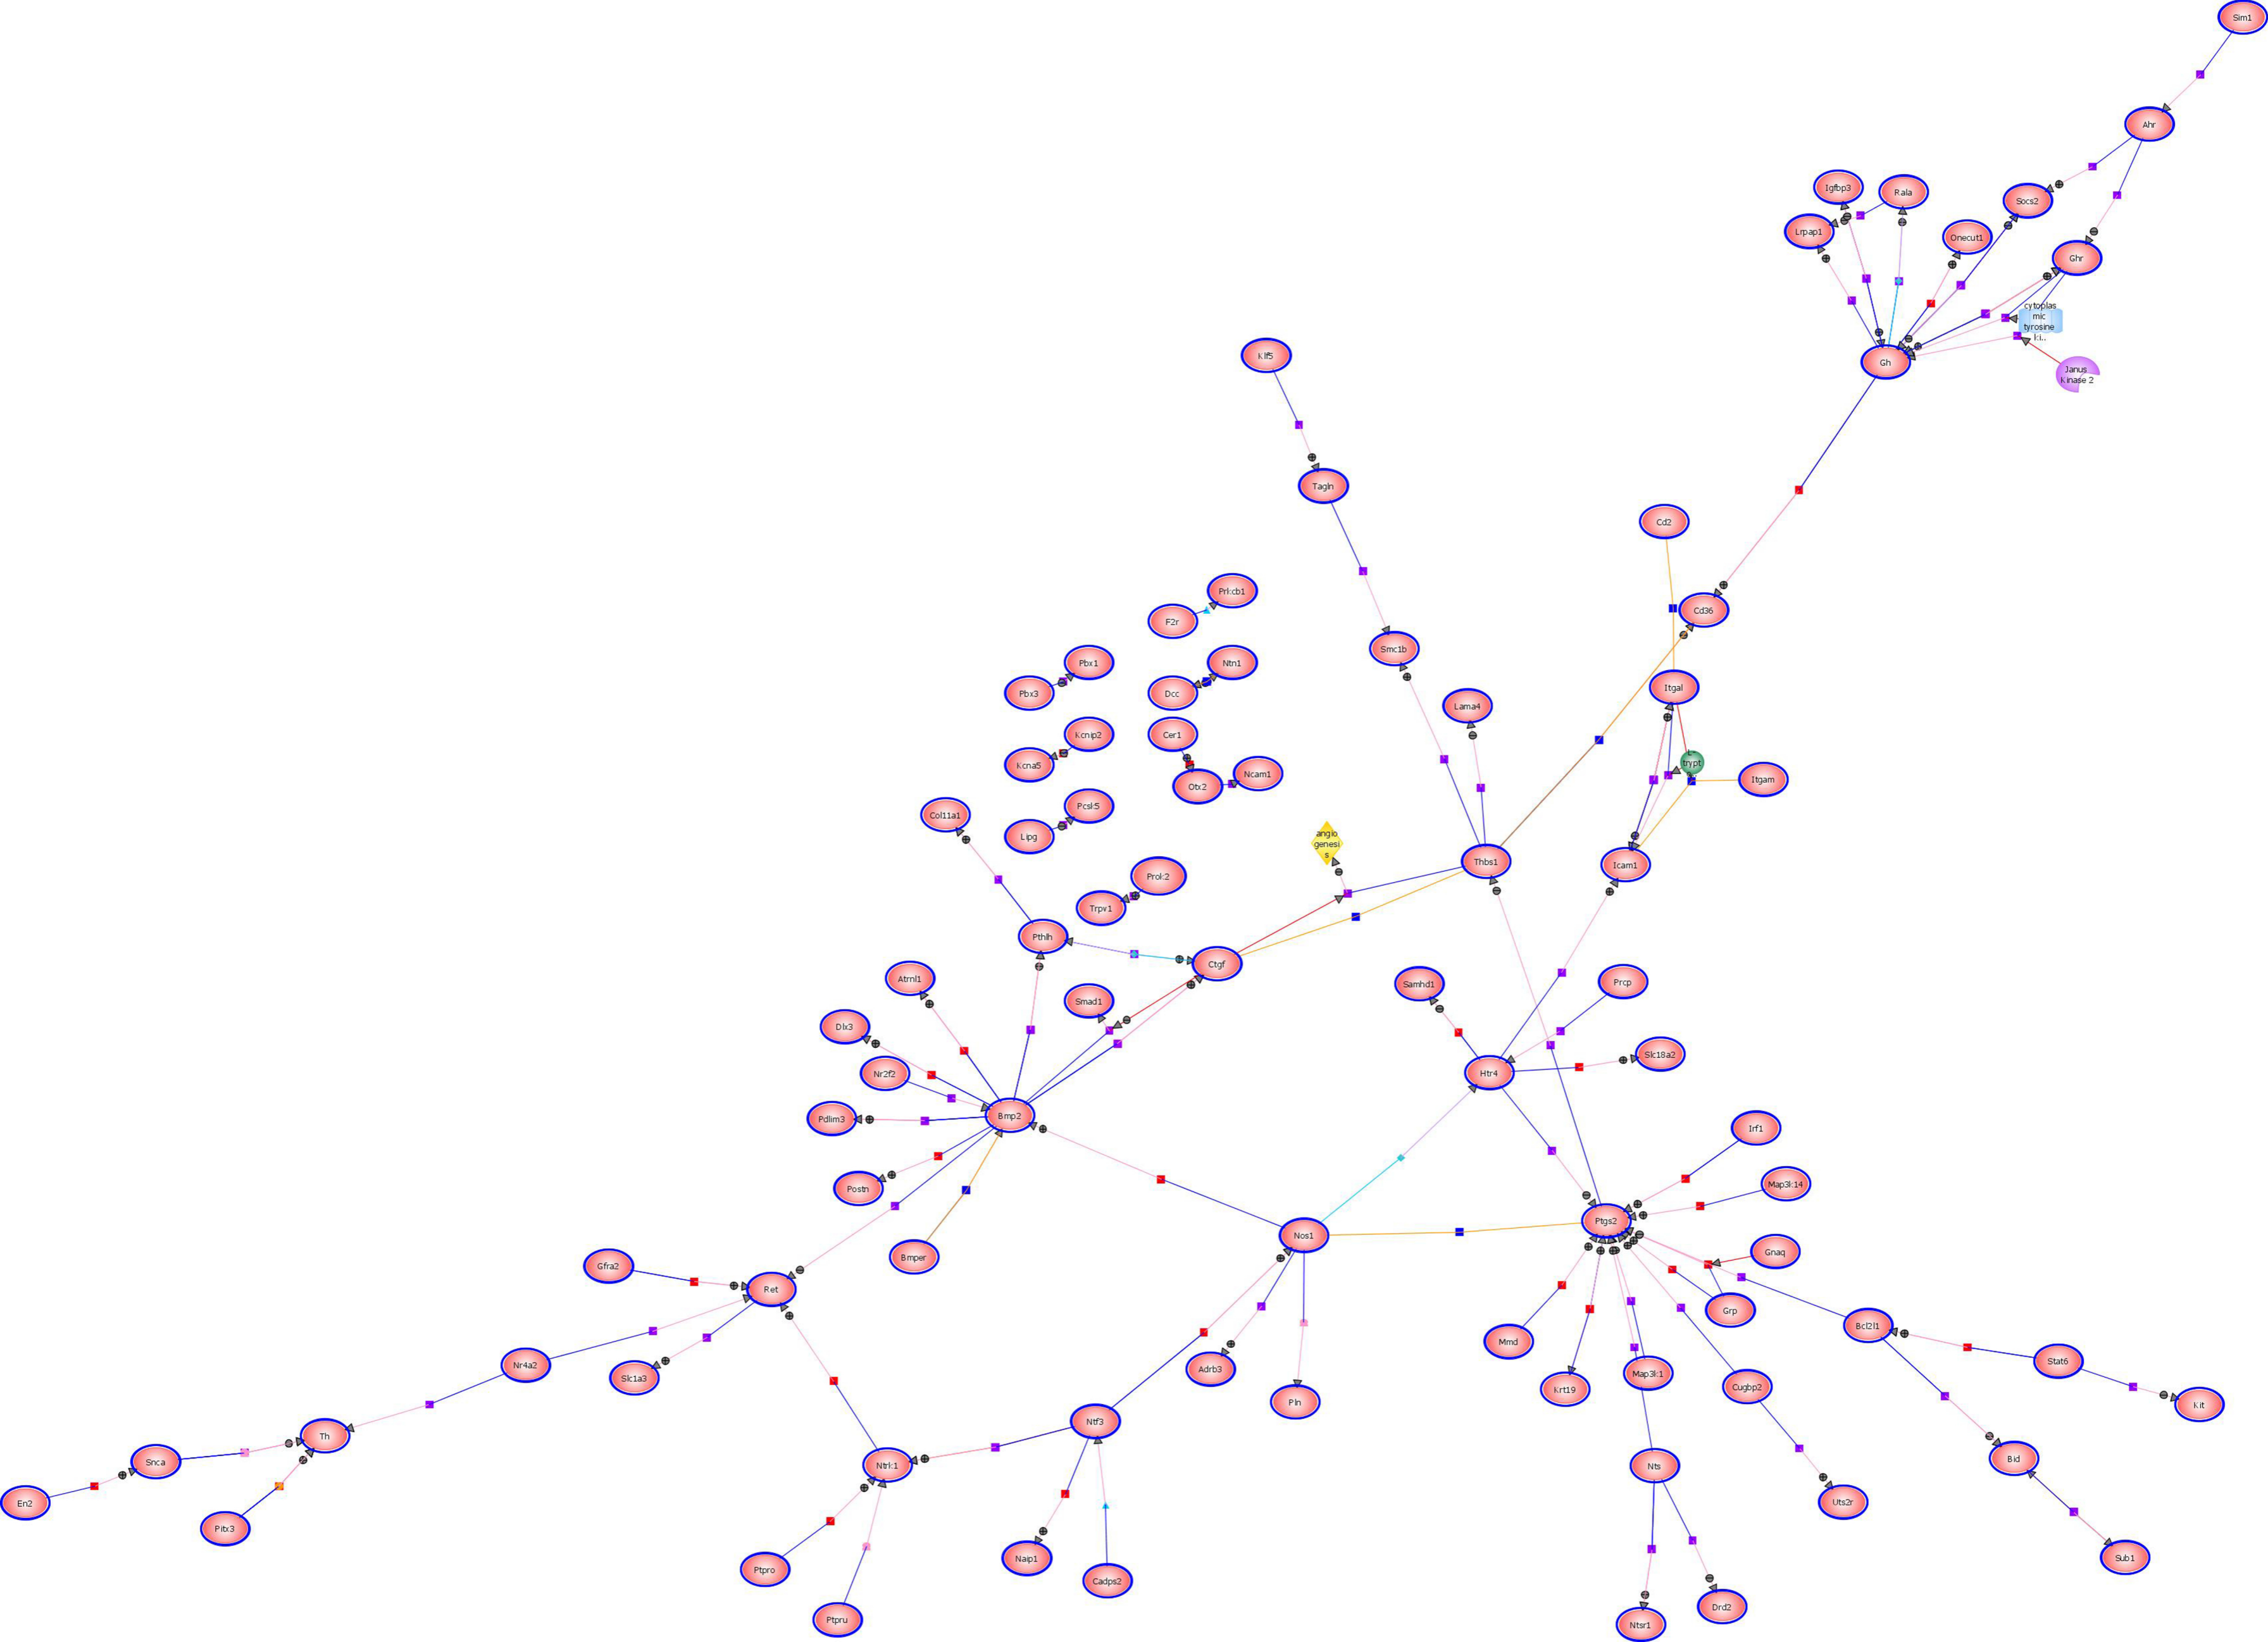

**Figure S1.** Significant direct interactions ( $P < 0.05$ ) between regulated genes were determined using Agilent Genespring software. Genes that were regulated on the array are highlighted with blue circles.

**Table S2.** CLOCK knockdown in the VTA changes the gene expression pattern

| Genes  | RT PCR         | Fold change | Microarray     | Fold change |
|--------|----------------|-------------|----------------|-------------|
| CHRNA3 | Up regulated   | 2.0*        | Up-regulated   | 2.6*        |
| Gabra  | Up regulated   | 1.7*        | Up-regulated   | 2.3*        |
| Trpc6  | Up regulated   | 2.1*        | Up-regulated   | 2.3*        |
| HCN1   | Down regulated | 2.9*        | Down-regulated | 1.6*        |
| Kctd9  | Down regulated | 1.7*        | Down-regulated | 1.9*        |
| CART   | Down regulated | 11.0*       | Down-regulated | 8.8*        |
| TH     | Up regulated   | 2.0*        | Up-regulated   | 2.0*        |
| DR2    | Up regulated   | 3.4*        | Up-regulated   | 2.4*        |
| Nos1   | Up regulated   | 2.3*        | Up-regulated   | 2.3*        |
| Penk1  | Down regulated | 2.1*        | Down-regulated | 1.5*        |

Gene expression was measured using RT-PCR with gene specific primers (Table S3).

\* $p < 0.05$ ,  $n = 6$ .

**Table S3.** List of primers used for RT PCR

| Genes  | Forward primer             | Reverse primer            |
|--------|----------------------------|---------------------------|
| CHRNA3 | acgtctaggatcaaggtgcca      | ccaagattccagaaacactcgcct  |
| Gabra  | taatacaacaggggctgctg       | atgctccaaatgtgactgg       |
| Trpc6  | caagtacaaggagctcagaag      | tccttatcaatctgggcctg      |
| HCN1   | ctcttttgctaacgccgat        | cattgaaattgtccaccgaa      |
| Kctd9  | ctgtgaacacagtagtaggcct     | tagaaccatttgacacagc       |
| CART   | ccctggacatctactctgccgtgg   | ttgagcttctcaggacttcttgca  |
| TH     | caggatgagctgcacaccctg      | atgcaggaccatcctggagc      |
| DR2    | tcttctggtggtggccacactggtat | acaggttcaagatgcttgctgtgc  |
| Nos1   | tccgaagttttggcaacag        | taggcagtgtacagctctctg     |
| Penk1  | ccaacaatgacgaagacatgagca   | tagtccatccaccactcggggcgtc |



## Minimum Information About a Microarray Experiment (MIAME)

### *Array design description:*

1) Array used: Affymetrix mouse genome 430 2.0 (information regarding the details of this array can be found at [www.affymetrix.com](http://www.affymetrix.com))

2) Normalization: All arrays were normalized using the probe logarithmic intensity error estimation (PLIER) algorithm in the Genespring program.

### *Experimental design:*

1) Corresponding author contact information: Colleen McClung ([Colleen.McClung@UTSouthwestern.edu](mailto:Colleen.McClung@UTSouthwestern.edu))

2) Types of experiments:

Gene knock-down by RNAi

3) Experimental factors:

Viral manipulation of gene expression

4) Number of hybridizations in the study: 6

5) A common reference RNA was not used.

6) Quality control measures used: Arrays were only used if: 3'/5' ratios of  $\beta$ -actin and GAPDH were  $< 3$  and both genes were present at high levels, the overall percent genes "present" was  $> 40\%$ , and the spiked controls were present in the appropriate amounts. Labeled RNA was not used for array analysis if the 260/280 ratio was less than 1.9 or the final amount of RNA recovered after amplification was  $< 30$   $\mu$ g. All arrays were done in triplicate with biological replicates (i.e. RNA from separate animals was used in the hybridization). As well, realtime PCR reactions were performed to validate array results.

7) Description of the experiments: The following sets were analyzed:

Clock shRNA AAV infection

Scr shRNA AAV infection

*Samples used, extract preparation and labeling:*

1) Bio-source properties:

- a) All mice were adult males.
- b) Tissue was taken at ~10 weeks of age
- c) The area of the brain investigated was the VTA
- d) Strain of mouse used in each experiment: C57/Bl6 Jackson Labs

2) Biomaterial manipulations:

- a) All mice were raised under 12:12 dark/light conditions, housed 4 per cage with food and water *ad libitum*.
- b) The VTA was dissected from 300  $\mu$ M slices using a dissection scope.

3) Extract preparation: tissue punches were dissected and immediately frozen on dry ice. Total RNA was isolated from tissue punches from individual mice using the TriZol Reagent (Invitrogen) according to the manufacturer's instructions. Following RNA extraction, any remaining genomic DNA was digested for 15 min using the DNA Free system according to the manufacturer's instructions (Ambion, Austin, TX).

4) cDNA synthesis from total RNA (Invitrogen reagents), cRNA amplification and labeling (Affymetrix kit), hybridization (hybridization oven 640), and washing (fluidics station 400) were accomplished according to the manufacturer's instructions (Affymetrix).

5) Affymetrix standard spike controls were used in all experiments (eukaryotic hybridization control kit). For additional information on hybridization procedures and reagents please visit [www.Affymetrix.com](http://www.Affymetrix.com)

*Measurement data and specifications:*

- 1) Arrays were scanned on the Agilent Gene Array scanner (Affymetrix).
- 2) Image analysis was performed using Microarray Suite 5.0 (Affymetrix).

3) The raw data were initially analyzed and normalized using the PLIER algorithm in the Genespring program. Comparative analysis was also performed in Genespring utilizing the Mann Whitney test followed by an unpaired t-test to compare the *Clock* shRNA group with control animals that were handled, treated, and dissected at the same time. For this study, we used the Benjamini Hochberg method for false discovery rates which compares the computed  $P$  values to adjusted  $P$  values and utilized a false discovery rate in this experiment of  $\sim 0.2$  for all arrays. Each experiment was performed in triplicate, from completely separate animals. Data files from Genespring were exported into Excel (Microsoft). Genes were considered to be regulated if they were expressed in this tissue (raw value  $> 20$ ) greater than 1.36 fold regulated with a  $p < 0.05$  following both statistical tests.

1. Hommel JD, Sears RM, Georgescu D, Simmons DL, DiLeone RJ (2003): Local gene knockdown in the brain using viral-mediated RNA interference. *Nat Med.* 9:1539-1544.
2. Zolotukhin S, Byrne BJ, Mason E, Zolotukhin I, Potter M, Chesnut K, *et al.* (1999): Recombinant adeno-associated virus purification using novel methods improves infectious titer and yield. *Gene Ther.* 6:973-985.
3. McClung CA, Sidiropoulou K, Vitaterna M, Takahashi JS, White FJ, Cooper DC, *et al.* (2005): Regulation of dopaminergic transmission and cocaine reward by the Clock gene. *Proc Natl Acad Sci U S A.* 102:9377-9381.
4. Zachariou V, Bolanos CA, Selley DE, Theobald D, Cassidy MP, Kelz MB, *et al.* (2006): An essential role for DeltaFosB in the nucleus accumbens in morphine action. *Nat Neurosci.* 9:205-211.
5. Siepka SM, Takahashi JS (2005): Methods to record circadian rhythm wheel running activity in mice. *Methods Enzymol.* 393:230-239.
6. Krishnan V, Han MH, Graham DL, Berton O, Renthal W, Russo SJ, *et al.* (2007): Molecular adaptations underlying susceptibility and resistance to social defeat in brain reward regions. *Cell.* 131:391-404.
7. Wallace DL, Han MH, Graham DL, Green TA, Vialou V, Iniguez SD, *et al.* (2009): CREB regulation of nucleus accumbens excitability mediates social isolation-induced behavioral deficits. *Nat Neurosci.* 12:200-209.
8. LaPlant Q, Chakravarty S, Vialou V, Mukherjee S, Koo JW, Kalahasti G, *et al.* (2009): Role of nuclear factor kappaB in ovarian hormone-mediated stress hypersensitivity in female mice. *Biol Psychiatry.* 65:874-880.
9. Han MH, Bolanos CA, Green TA, Olson VG, Neve RL, Liu RJ, *et al.* (2006): Role of cAMP response element-binding protein in the rat locus ceruleus: regulation of neuronal activity and opiate withdrawal behaviors. *J Neurosci.* 26:4624-4629.

10. Johnson SW, North RA (1992): Two types of neurone in the rat ventral tegmental area and their synaptic inputs. *J Physiol.* 450:455-468.
11. Bonci A, Malenka RC (1999): Properties and plasticity of excitatory synapses on dopaminergic and GABAergic cells in the ventral tegmental area. *J Neurosci.* 19:3723-3730.
